# **In Silico transcriptional analysis of asymptomatic and severe COVID-19 patients reveals the susceptibility of severe patients to other comorbidities and non-viral pathological conditions**

Poonam Sen<sup>1</sup>, Harpreet Kaur<sup>1\*</sup>

1. Pine Biotech, New Orleans, U.S.A.

## **Emails of Authors**

Poonam Sen: [senpoonam1490@gmail.com](mailto:senpoonam1490@gmail.com)

Harpreet Kaur: [hks04180@gmail.com](mailto:hks04180@gmail.com); [harpreet@pine.bio](mailto:harpreet@pine.bio)

## **\* Correspondence**

Harpreet Kaur, PhD

Curriculum Developer & Research Consultant

Pine Biotech

1441 Canal St #229, New Orleans, LA 70112, United States

Email: [hks04180@gmail.com](mailto:hks04180@gmail.com); [harpreet@pine.bio](mailto:harpreet@pine.bio)

ORCID ID: <https://orcid.org/0000-0003-0421-8341>

Homepage: <https://www.linkedin.com/in/harpreet-kaur-phd-b06722134/>

## 1 **Abstract**

2 COVID-19 is a severe respiratory disease caused by SARS-CoV-2, a novel human  
3 coronavirus. The host response to SARS-CoV-2 infection is not clearly understood. Patients  
4 infected with SARS-CoV-2 exhibit heterogeneous intensity of symptoms, i.e., asymptomatic,  
5 mild, and severe. Moreover, effects on organs also vary from person to person. These  
6 heterogeneous responses pose pragmatic hurdles for implementing appropriate therapy and  
7 management of COVID-19 patients. Post-COVID complications pose another major  
8 challenge in managing the health of these patients. Thus, understanding the impact of disease  
9 severity at the molecular level is vital to delineate the precise host response and management.  
10 In the current study, we performed a comprehensive transcriptomics analysis of publicly  
11 available seven asymptomatic and eight severe COVID-19 patients. Exploratory data analysis  
12 using Principal Component Analysis (PCA) showed the distinct clusters of asymptomatic and  
13 severe patients. Subsequently, the differential gene expression analysis using DESeq2  
14 identified 1,224 significantly upregulated genes ( $\log_{2}FC \geq 1.5$ , p-adjusted value  $< 0.05$ ) and  
15 268 significantly downregulated genes ( $\log_{2}FC \leq -1.5$ , p-adjusted value  $< 0.05$ ) in severe  
16 samples in comparison to asymptomatic samples. Eventually, Gene Set Enrichment Analysis  
17 (GSEA) of upregulated genes revealed significant enrichment of terms, i.e., anti-viral and  
18 anti-inflammatory pathways, secondary infections, Iron homeostasis, anemia, cardiac-related,  
19 etc. Gene set enrichment analysis of downregulated genes indicates lipid metabolism,  
20 adaptive immune response, translation, recurrent respiratory infections, heme-biosynthetic  
21 pathways, etc. In summary, severe COVID-19 patients are more susceptible to other health  
22 issues/concerns, non-viral pathogenic infections, atherosclerosis, autoinflammatory diseases,  
23 anemia, male infertility, etc. And eventually, these findings provide insight into the precise  
24 therapeutic management of severe COVID-19 patients and efficient disease management.

25

## 26 **Keywords**

27 SARS-CoV-2, 2019-nCoV, COVID-19, Transcriptomics, Pathways, DGE (Differentially  
28 Expressed Genes), ARDS (acute respiratory distress syndrome)

29

30

31

32

33

34

## 35 **1. Introduction**

36 Since its first reported case at the end of 2019, an acute respiratory syndrome causing novel  
37 Coronavirus (2019-nCoV) outbreak in the human population has taken the world by storm.  
38 The 2019-nCoV was later officially named SARS-CoV-2 (Severe Acute Respiratory  
39 Syndrome related novel Coronavirus 2), and the disease caused by it COVID-19  
40 (Coronavirus Disease 2019) [1-3]. The virus spread uncontrollably so much that in January  
41 2020, World Health Organization declared COVID-19 as a "public health emergency of  
42 international concern" (PHEIC) and eventually as a pandemic in March 2020 [1]. As of 1<sup>st</sup>  
43 April 2022, the total reported cases worldwide stand at 488,190,137 [4]. The SARS-CoV-2 is  
44 an enveloped, positive single-stranded RNA virus that belongs to the Coronaviridae family,  
45  $\beta$ -coronavirus genus, and is believed to have a zoonotic to human transmission [3, 5, 6]. The  
46 trimeric spike (S) protein that forms the virus's envelope plays an essential role in the virus-  
47 host cell interaction [7]. There are six other coronaviruses, i.e., 229E, OC43, NL63, HKU1,  
48 SARS-CoV, and MERS-CoV, which are already known to infect humans and cause  
49 respiratory and gastrointestinal problems [8]. These human coronaviruses (HCoVs) are  
50 generally considered inconsequential except for our experience with SARS-CoV in 2003,  
51 MERS in 2012, and SARS-CoV-2 with the ongoing pandemic [9].

52 The mutations in the viral spike protein components, especially in its receptor-binding  
53 domain, have resulted in the generation of multiple variants, of which Delta variant  
54 (B.1.617.2) became a "variant of concern" (VOC) and posed a significant threat to human  
55 health [10-12]. Our health sector has faced major challenges in tackling disease spread and  
56 providing management of symptoms in the patients [13]. Multiple drugs are introduced for  
57 symptomatic treatments, but none has been efficient to treat all symptoms caused due to the  
58 viral infection [14]. Even a few drugs that were believed to be helpful in COVID-19 disease  
59 management were later found to cause other health concerns in the patients administered with  
60 these [15]. The difficulty faced in devising standard therapeutic options is due to the high  
61 mutability rate of the virus, a complex interplay of virus-host interaction, and an individual's  
62 immune response to the infection [16-19].

63 SARS-CoV-2 impacts individuals in peculiar ways [16]. Most infected subjects are  
64 asymptomatic or mildly symptomatic, but some develop severe symptoms [16].  
65 Comorbidities such as diabetes mellitus, hypertension, cardiovascular disease (CVD), and  
66 advanced age further increase the risk of disease severity [20-23]. As in many asymptomatic  
67 or mild cases, diagnostic test reports false-negative results even in the presence of infection,

68 and due to the shared spectrum of symptoms with other viral infections, it becomes difficult  
69 to discern COVID-19 from other viral infections [24]. This makes disease management  
70 further complicated. Another primary concern associated with COVID-19 is high infectivity  
71 as it spreads by human contact and through air droplets and aerosols, making it difficult to  
72 control [25, 26]. COVID-19 spread through fecal matter is speculated in some studies, though  
73 the presence of viral particles in the fecal samples of infected individuals is well documented  
74 and makes it an essential diagnostic tool [27, 28]. The main clinical manifestations of SARS-  
75 CoV-2 in severe COVID-19 patients involve lower respiratory tract issues resulting in Acute  
76 Respiratory Distress Syndrome (ARDS) and hypoxia, fever, cytokine storm due to  
77 hyperactive immune system, brain fog, headache, cardiac arrest, and multi-organ damage and  
78 even death in severe cases [22, 29-33]. Most disease symptoms may persist for 10-15 days,  
79 with some may exist for a prolonged time [34, 35]. It is well known that even after the viral  
80 load declines significantly, many health issues persist in the COVID-19 recovered patients  
81 [36-38]. These post-COVID effects are observed mainly in hospitalized and severe patients  
82 and add to another layer of disease mismanagement [39, 40]. So, the significant challenges of  
83 disease management include SARS-CoV-2's high infectivity rate, poor efficacy of available  
84 treatments, the complexity of symptoms, and less understanding of disease progression [41].  
85 SARS-CoV-2, upon entry into the nasopharyngeal tract, interacts with the transmembrane  
86 serine protease 2 (TMPRSS2) and Angiotensin-Converting Enzyme 2 (ACE2) receptors  
87 present on the endothelial cells of the respiratory tract [42]. ACE2 receptors are also present  
88 in other organs, such as the gastrointestinal tract, lymph nodes, thymus, bone marrow, spleen,  
89 liver, kidney, skin, and brain. This might be the possible reason for the viral impact on these  
90 organs [33, 43-46]. As extensively studied, virus entry in these organs is mediated through  
91 the interaction of receptor-binding domain on spike protein of virus and the ACE2 receptors  
92 present on host cells [45, 47]. Upon infection, the virus replicates inside the host cell using  
93 the host replication machinery. In response to all this, the host immune system fights to  
94 reduce the viral load by inhibiting the replication of viral RNA. The diverse symptoms results  
95 from the involvement of various biochemical pathways triggered by viral entry and  
96 replication, the host cellular response to control the spread of the infection [48].  
97 With the advancement in the RNA sequencing technology, one can view the transcriptomic  
98 landscape under a given condition and for a particular cell type. It is also instrumental in  
99 understanding the pathogenesis of a disease in the host [49]. Diverse scientific groups across  
100 the globe have developed numerous resources and tools to compile and analyze the data from  
101 host and pathogen [50-73].

102 Due to the systemic effects of COVID-19 infection, it becomes more challenging to treat  
103 patients with complex symptoms. Hence, we believe studying the differential mechanism  
104 operating in asymptomatic and severe COVID-19 patients can help us manage disease  
105 manifestations in severe patients. Thus, we performed a comparative analysis of  
106 transcriptomics profiles of severe and asymptomatic COVID-19 patients using PCA and  
107 DESeq2. Exploratory analysis based on PCA of samples shows two clear, distinct clusters of  
108 severe and asymptomatic samples. The differential gene expression analysis revealed  
109 significantly altered transcriptomics patterns between these two groups. Subsequently, Gene  
110 Set Enrichment Analysis (GSEA) identified some of the key altered pathways and biological  
111 processes involved in severe patients compared to asymptomatic patients.

112

## 113 **2. Methods**

### 114 **2.1. Dataset and Experimental design**

115 In the current study, we obtained publicly available data (GSE178967) from the NCBI GEO  
116 (Gene Expression Omnibus). This dataset comprises RNA-Seq read counts and metadata  
117 information conducted on 108 SARS-CoV-2 subjects by the Stanford COVID-19 CTRU [74].  
118 These COVID-19 subjects, confirmed by RT-PCR, were administered Peginterferon Lambda  
119 and placebo on day00. Peginterferon Lambda is a therapeutic drug for reducing the viral  
120 particles in COVID-19 patients [75]. Whole blood samples for RNA extraction for high  
121 throughput sequencing were collected on day 00 (untreated) and day 05 (treated) from the  
122 day of drug administration. The available RNA sequencing data are the read counts aligned to  
123 transcripts or genes for 180 samples from day 00 and day 05 of 108 subjects. In the series  
124 matrix file (provided in GEO), the COVID-19 subjects are categorized as asymptomatic,  
125 moderately symptomatic, and severe [74]. We have also used the same categorization of  
126 subjects for our analysis. The series matrix file contains other clinically significant  
127 information such as age, gender, day from drug administration (Peginterferon Lambda and  
128 placebo), and viral shedding value. The details and data structure of the study are summarized  
129 in Table 1 and Supplementary Table S1, respectively. The summary of clinical information  
130 extracted from the GEO series matrix is provided in Supplementary Table S2.

131

132

133

134

135

**Table 1: Detail of the study as derived from GEO [1]**

|                      |                                                                                                                              |
|----------------------|------------------------------------------------------------------------------------------------------------------------------|
| <b>GEO accession</b> | Series GSE178967                                                                                                             |
| <b>Study title</b>   | Baseline signatures associated with clinical, virologic, and immunologic outcomes in patients with mild to moderate COVID-19 |
| <b>Organism</b>      | <i>Homo Sapiens</i>                                                                                                          |
| <b>Bio project</b>   | PRJNA741686                                                                                                                  |
| <b>SRA</b>           | SRP325729                                                                                                                    |
| <b>Platform</b>      | GPL24676<br>Illumina NovaSeq 6000                                                                                            |

136

## 137 **2.2. Data Preparation and normalization**

### 138 **2.2.1. Data Pre-processing**

139 The data contains sample IDs in row 1, transcript IDs (ENST ID) in column 1, gene symbols  
140 in column 2, and corresponding non-normalized read counts in the matrix as integer values.  
141 The sample IDs belong to asymptomatic, moderately symptomatic, or severe subjects from  
142 day 0 or day 5 of peginterferon lambda and placebo administration. The RNA sequencing  
143 expression values of the dataset are non-normalized read counts (as mentioned in  
144 supplementary file information of the original dataset submitted in GEO) [74]. These read  
145 counts are the number of reads mapped and aligned to a particular transcript/gene region  
146 identified from the human reference genome. It is generally required to pre-process the read  
147 count data to get statistically significant results [76-80]. We followed common pre-processing  
148 steps for both PCA and Differential Gene Expression (DGE) analysis, but the normalization  
149 steps were different based on the downstream analyses. The Principal Component Analysis is  
150 a dimensionality reduction unsupervised machine learning method that requires normalized  
151 data [78, 79, 81, 82]. While DESeq2 is a DGE analysis tool that mandates data to be  
152 unprocessed read counts as integer values [83]. DESeq2 uses inbuilt methods to normalize for  
153 library size and hence does not require prior normalization [83-85].  
154 The summary of workflow, including pre-processing and normalization, is depicted in Figure  
155 1. In pre-processing, we removed rows with NA, taken the average of duplicates genes using  
156 aggregate function in R, and filtered out the genes having zero or low expression. Studies

157 suggest that low expression genes negatively impact the Differentially Expressed Gene  
158 analysis [86]. Thus, genes with low or zero variance filtered out using the `nzv` (non-zero  
159 variance) function of the "Caret package" available in R [87]. Genes with zero variance  
160 across all samples are considered insignificant as these do not contribute to statistical  
161 significance and only increase time in the analysis [77, 88]. After removing genes with low  
162 expression values, we performed further pre-processing specific to PCA, and for DESeq2, we  
163 continued with the pre-processed and non-normalized data. Notably, we performed  
164 exploratory data analysis using PCA on normalized data while differential gene expression  
165 analysis using DESeq2 on raw read count values.

### 166 2.2.2. Data Normalization

167 After the abovementioned pre-processing, subsequently, for PCA, we normalized the read  
168 counts by transforming them to log values and then performing center and scaling using the  
169 "Caret package" available in R [87]. The data matrix that resulted from PCA normalization  
170 contains 180 samples with log-transformed read counts for 35,587 gene rows.

171

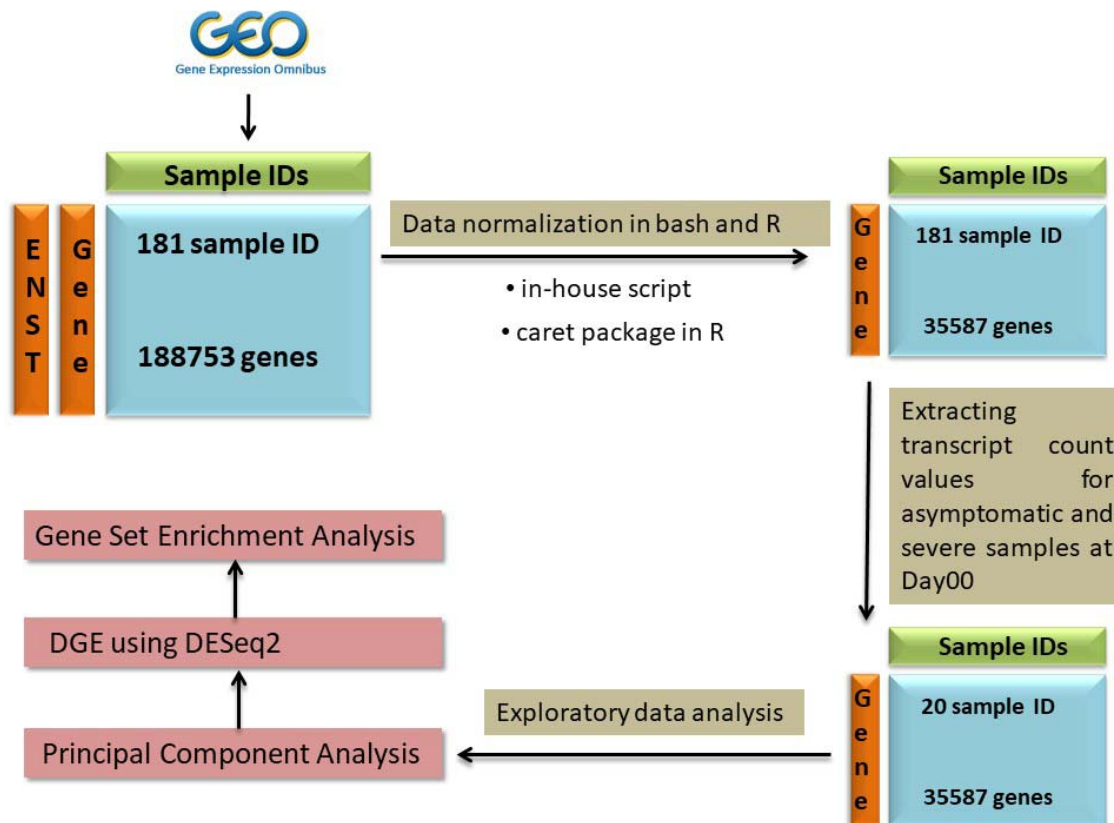

172

173

174 Figure 1. The Complete workflow of the study.

## 175 **2.3. Analysis Methodology**

### 176 **2.3.1. Exploratory Data Analysis using Principal Component Analysis**

177 We performed Principal Component Analysis (PCA) to identify the patterns in the dataset  
178 and variations between the samples in a group. PCA reduces the dimensions of a large dataset  
179 while retaining most of the variations. Hence, PCA assists in identifying sample clusters in a  
180 particular group and outliers [89]. We performed PCA on normalized data (comprising 180  
181 samples with log-transformed read counts for 35,587 gene rows) using the ggfortify package  
182 in R. The first PCA includes all 180 samples of asymptomatic, moderately symptomatic, and  
183 severe subjects. Then we performed PCA for various groups as mentioned in Supplementary  
184 Table S3. One of these PCA, consists of asymptomatic and severe patients at Day 00  
185 (untreated) which we believe will help us understand the host response mechanism in severe  
186 patients in comparison to asymptomatic. The total number of samples belonging to this group  
187 was 15, with seven asymptomatic and eight severe samples. With the help of scatterplots  
188 based on PCA components, we identified outliers, which were subsequently removed from  
189 the data for the downstream PCA and DGE analysis on untreated (Day 00) group.

### 190 **2.3.2. Differential gene expression analysis**

191 After outliers removal using PCA, we performed differential gene expression analysis  
192 between severe and asymptomatic patients' samples using the DESeq2 package in R [83].  
193 Notably, we considered only those genes as significantly expressed between groups with a p-  
194 adjusted value  $<0.05$ . This criterion of p-adjusted value is used in numerous studies [83, 90-  
195 98]. Further, we applied another filter, i.e., Log2 fold change (Log2FC) to identify  
196 significantly upregulated (Log2FC  $\geq 1.5$ ) and downregulated (Log2FC  $\leq -1.5$ ) genes in the  
197 severe patients in comparison to asymptomatic patients. Additionally, to understand patterns  
198 in gene expression between asymptomatic and severe patients, we constructed heatmaps  
199 using the heatmap function in R [99]. Heatmap is a grid-like graphical representation of the  
200 expression of genes (in rows) in all the samples (in columns) taken into consideration [100].

### 201 **2.3.3. Biological annotation**

202 Subsequently, to understand the biological implication of significantly differentially  
203 expression genes obtained from DESeq2 analysis in severe patients, we performed gene  
204 enrichment analysis using the Enrichr [101-103]. We queried the upregulated and  
205 downregulated gene sets independently in the Enrichr search engine [104]. Enrichr gives  
206 various Gene Set Enrichment terms as output which can be analyzed for significance based  
207 on four ranking parameters, i.e., p-value, adjusted p-value, odds ratio, combined scores [103].



208 Enrichr visualization bar graph shows top enrichment terms with significance depicted by the  
209 length and color of the bar. An enrichment term with a more extended bar and a lighter shade  
210 of red indicate higher significance than a term with a shorter bar and darker red color or grey  
211 color [103]. A few of the top Gene Set Enrichment terms are, i.e., KEGG Human,  
212 WikiPathway, Gene Ontology (GO) terms, Jensen diseases, Human phenotype ontology, etc.,  
213 based on p-value ( $<0.05$ ). To identify significant pathways involved in each enrichment term,  
214 we used the q-value (adjusted p-value)  $< 0.05$ . Besides, we searched for the top significant  
215 and differentially expressed genes (from our analysis) in the literature to understand their  
216 already known role in COVID-19 pathogenesis.

217

### 218 **3. Results**

219 In the current study, we analyzed the transcriptomic profiles of asymptomatic and severe  
220 COVID-19 patients to compare the transcriptional changes and understand the biological  
221 implications of infection. A publicly available RNA sequencing read count dataset was  
222 extracted, pre-processed, and normalized. We performed exploratory data analysis using PCA  
223 to understand variations between groups and to identify outliers. Subsequently, we performed  
224 differential gene expression analysis between these identified groups (Severe vs.  
225 Asymptomatic). Eventually, gene enrichment analysis was performed using the significantly  
226 differentially expressed gene sets to discern their biological involvement in viral immuno-  
227 pathogenesis.

#### 228 **3.1. Data Pre-processing**

229 After the pre-processing, we are able to remove genes without identifiers, zero expression,  
230 and low variance in the data. Thus, the total number of genes reduced from 188,753 to 35,587  
231 in the data. Subsequently, this dataset was used for exploratory and DGE analysis.

#### 232 **3.2. Exploratory Data Analysis**

233 We analyzed each group's scatter plot and principal components to identify if any of the top  
234 Principal Components (PC) showed significant variations. The scatter plots for all Principal  
235 Component Analysis performed are provided in Figure 2 and Supplementary Figure 1 A-C.  
236 The scatter plot in Supplementary Figure 1.A represents all three groups, i.e., untreated and  
237 treated asymptomatic, moderately symptomatic, and severe. However, three outliers can be  
238 observed at the bottom left of the plot; the clustering does not show any clear distinction  
239 between the three groups. PCA for remaining groups, i.e., severe male v/s female, severe  
240 below 45 years age v/s above 45 years age (Supplementary Figure S1 B and C also did not

241 show any clear groups. The top principal components in these groups also did not show  
242 significant variations. Thus, we mainly shifted our focus to two critical groups, i.e.,  
243 asymptomatic (untreated or day 00) and severe (untreated or day 00), since these are two  
244 contrasting viral infection conditions and interestingly, they also represent lesser within-  
245 group variation. The PCA between untreated asymptomatic (n=7) and untreated severe  
246 samples (n=8) represent nearly 61.8% variation in the data, wherein PC1 contributes 49.49%,  
247 and PC2 contributes ~ 12.39% variation (Figure 2A). Using the clustering patterns in PCA,  
248 we identified seven samples as outliers. We removed these outlier samples and then  
249 performed PCA on the remaining eight samples (four severe and four asymptomatic), that  
250 represented nearly 48.61% variation in the data, where PC1 represents 34.64%, and PC2  
251 represents 13.97% variation. So, Scatterplots based on the PC1 and PC2 of untreated  
252 asymptomatic and severe samples show clear distinction, and we got down to 4 samples in  
253 each group (Figure 2B). For a significant DGE analysis, the minimum number of samples in  
254 each group must be three, so we considered these four samples from both groups for further  
255 downstream analysis.

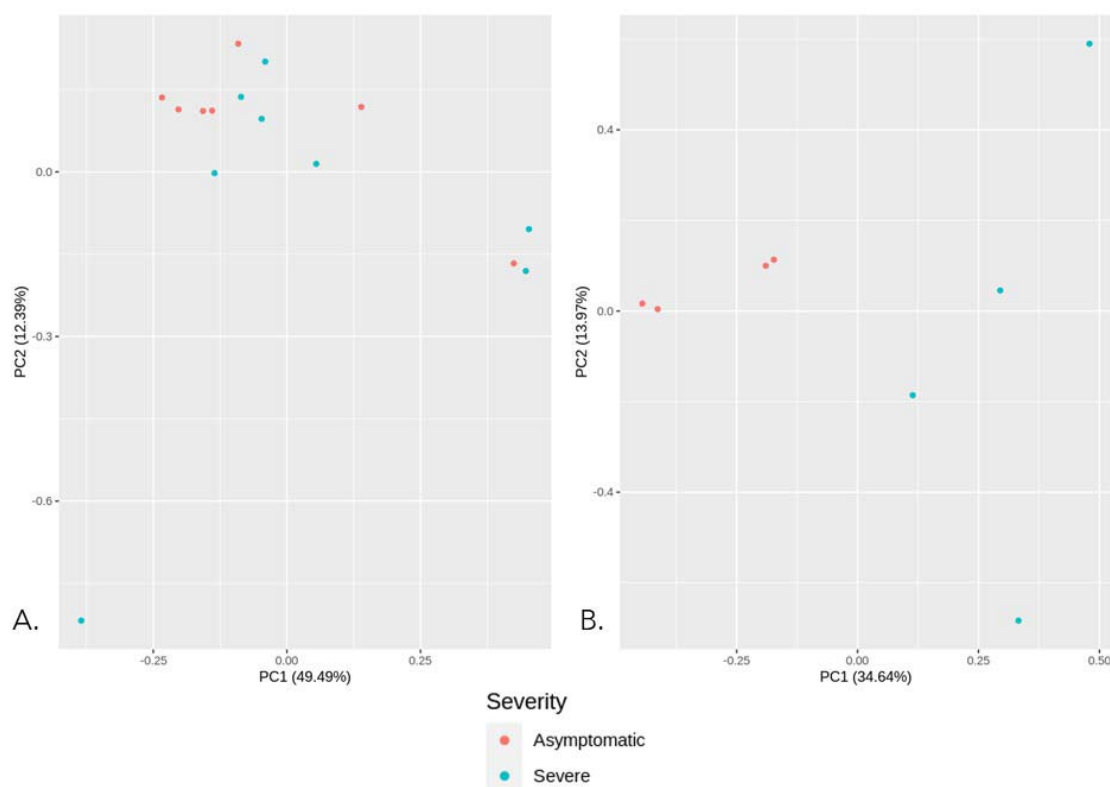

257 Figure 2. Principal Component Analysis between untreated asymptomatic and severe groups.  
258 A. PCA between asymptomatic (n=7, Day00) v/s severe samples (n=8, Day00) B. PCA  
259 between asymptomatic (n=7, Day00) v/s severe samples (n=8, Day00) after outlier removal.  
260

### 261 **3.3. Differential gene expression analysis**

262 Differential gene expression analysis between untreated severe and asymptomatic samples  
263 using DESeq2 identified 2,837 genes as significantly differentially expressed (p adjusted  
264 value < 0.05). From these 2,837 genes, 1224 genes were found to be significantly upregulated  
265 ( $\text{Log}_2\text{FC} \geq 1.5$ , p-adjusted value < 0.05) and 268 genes as significantly downregulated  
266 ( $\text{Log}_2\text{FC} \leq -1.5$ , p-adjusted value < 0.05) in severe samples in comparison to asymptomatic  
267 samples. The list of the total up-and downregulated genes is provided in Supplementary  
268 Tables S4 and S5, respectively. The volcano plot represents the pattern of differentially  
269 expressed genes (Figure 3). Each dot in the plot represents a single gene with  $\text{log}_2\text{FC}$  along  
270 the x-axis and  $-\text{Log}_{10}(\text{p-value})$  along the y-axis. In the volcano plot, the genes depicted in  
271 black color are nonsignificant, while genes in blue and red color represent most significantly  
272 differentially expressed genes with  $\text{padj} < 0.01$  and  $\text{padj} < 0.05$ , respectively. Further, heatmap  
273 (Figure 4) represents the expression pattern of the top 50 genes (25 upregulated and 25  
274 downregulated genes) in untreated severe COVID-19 samples in comparison to  
275 asymptomatic samples. The color scale denotes the expression values in the heatmap. The red  
276 color's intensity represents upregulated genes, and the yellow color's intensity represents  
277 downregulated genes in the sample under consideration. The top 25 upregulated and down  
278 regulated genes are mentioned in Table 2. with respective gene description.  
279

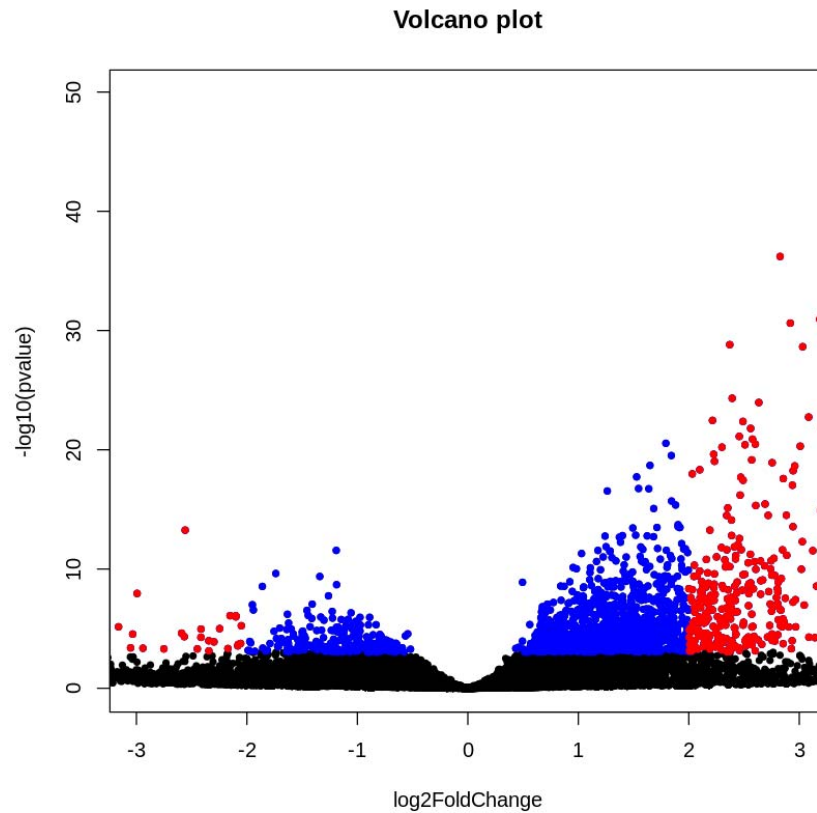

280

281 Figure 3. Volcano plot based on p-value and log2FC. Each dot here represents a single gene. Black  
282 represents nonsignificant genes, blue and red represent genes differentially regulated at padj < 0.01  
283 and padj < 0.05.

284

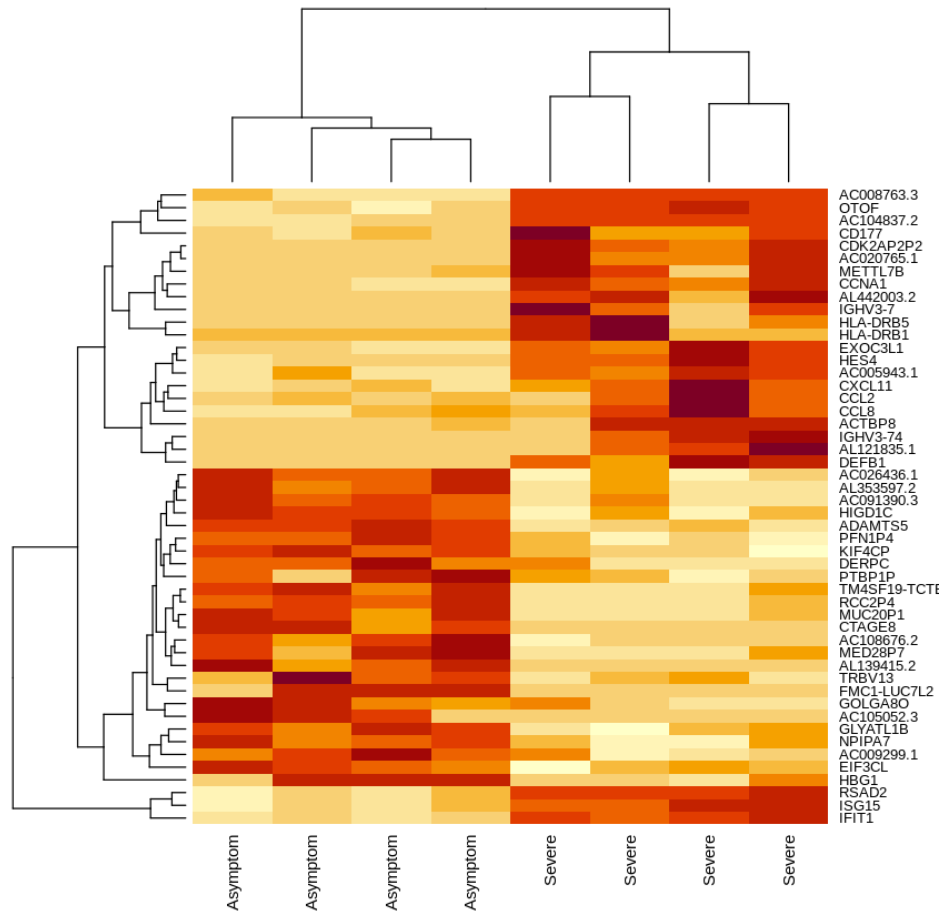

285

286 Figure 4. Heatmap based on top 25 upregulated and downregulated genes from DESEQ2 of  
 287 asymptomatic and severe samples.

288

289 Table 2: List of top 25 upregulated ( $\text{Log}_2\text{FC} \geq 1.5$ , p-adjusted value  $< 0.05$ ) and downregulated  
 290 ( $\text{Log}_2\text{FC} \leq -1.5$ , p-adjusted value  $< 0.05$ ) genes in severe COVID-19 subjects in comparison to  
 291 asymptomatic subjects with their gene description.

| TOP 25 UPREGULATED GENES |                                                                                  | TOP 25 DOWNREGULATED GENES |                                               |
|--------------------------|----------------------------------------------------------------------------------|----------------------------|-----------------------------------------------|
| Gene name                | Gene description                                                                 | Gene name                  | Gene description                              |
| <i>HLA-DRB1</i>          | Protein coding, Major Histocompatibility Complex, Class II, DR Beta 1 [105, 106] | <i>AC105052.3</i>          | sense overlapping [107]                       |
| <i>HLA-DRB5</i>          | Protein coding, Major Histocompatibility Complex,                                | <i>FMC1-LUC7L2</i>         | Protein coding, FMC1-LUC7L2 Readthrough [105, |

|                          |                                                               |                          |                                                                                     |
|--------------------------|---------------------------------------------------------------|--------------------------|-------------------------------------------------------------------------------------|
|                          | Class II, DR Beta 5 [105, 106]                                |                          | 106]                                                                                |
| <b><i>IGHV3-7</i></b>    | Protein coding, Immunoglobulin Heavy Variable 3-7 [105, 106]  | <b><i>CTAGE8</i></b>     | Protein coding, CTAGE Family Member 8 [105, 106]                                    |
| <b><i>ACTBP8</i></b>     | Pseudogene, ACTB Pseudogene 8 [105, 106]                      | <b><i>AL139415.2</i></b> | Processed pseudogenes [107]                                                         |
| <b><i>AC008763.3</i></b> | Novel protein [108, 109]                                      | <b><i>ADAMTS5</i></b>    | Protein coding, ADAM Metallopeptidase with Thrombospondin Type 1 Motif 5 [105, 106] |
| <b><i>CD177</i></b>      | Protein coding, CD177 Molecule [105, 106]                     | <b><i>MED28P7</i></b>    | Pseudogene, Mediator Complex Subunit 28 Pseudogene 7 [105, 106]                     |
| <b><i>AL442003.2</i></b> | NA                                                            | <b><i>MUC20P1</i></b>    | Pseudogene, Mucin 20, Cell Surface Associated Pseudogene 1 [105, 106]               |
| <b><i>IGHV3-74</i></b>   | Protein coding, Immunoglobulin Heavy Variable 3-74 [105, 106] | <b><i>RCC2P4</i></b>     | Pseudogene, Regulator Of Chromosome Condensation 2 Pseudogene 4 [105, 106]          |
| <b><i>ISG15</i></b>      | Protein coding, ISG15 Ubiquitin Like Modifier [105, 106]      | <b><i>PFNIP4</i></b>     | Pseudogene, Profilin 1 Pseudogene 4 [105, 106]                                      |
| <b><i>CCL2</i></b>       | Protein coding, C-C Motif Chemokine Ligand 2 [105, 106]       | <b><i>AL353597.2</i></b> | processed transcript, transcribed processed pseudogene [107]                        |
| <b><i>CCL8</i></b>       | Protein coding, C-C Motif Chemokine Ligand 8 [105, 106]       | <b><i>HBG1</i></b>       | Protein coding, Hemoglobin Subunit Gamma 1 [105, 106]                               |
| <b><i>OTOF</i></b>       | Protein coding, Otoferlin [105, 106]                          | <b><i>GOLGA80</i></b>    | Protein coding, Golgin A8 Family Member O [105, 106]                                |

|                          |                                                                                        |                                |                                                                                      |
|--------------------------|----------------------------------------------------------------------------------------|--------------------------------|--------------------------------------------------------------------------------------|
| <b><i>RSAD2</i></b>      | Protein coding, Radical S-Adenosyl Methionine Domain Containing 2 [105, 106]           | <b><i>TM4SF19-TCTEXID2</i></b> | RNA Gene, TM4SF19-DYNLT2B Readthrough (NMD Candidate) [105, 106]                     |
| <b><i>METTL7B</i></b>    | Protein coding, Methyltransferase Like 7B [105, 106]                                   | <b><i>DERPC</i></b>            | Protein coding, DERP<br>C Proline and Glycine Rich Nuclear Protein [105, 106]        |
| <b><i>HES4</i></b>       | Protein coding, Hes Family BHLH Transcription Factor 4 [105, 106]                      | <b><i>TRBV13</i></b>           | Protein coding, T Cell Receptor Beta Variable 13 [105, 106]                          |
| <b><i>CDK2AP2P2</i></b>  | Pseudogene, PTGER4P2-CDK2AP2P2 Readthrough, Transcribed Pseudogene [105, 106]          | <b><i>AC108676.2</i></b>       | Processed pseudogenes [107]                                                          |
| <b><i>IFIT1</i></b>      | Protein coding, Interferon Induced Protein With Tetratricopeptide Repeats 1 [105, 106] | <b><i>AC009299.1</i></b>       | Processed pseudogenes [107]                                                          |
| <b><i>AL121835.1</i></b> | Processed pseudogenes [107]                                                            | <b><i>HIGD1C</i></b>           | Protein coding, HIG1 Hypoxia Inducible Domain Family Member 1C [105, 106]            |
| <b><i>CCNA1</i></b>      | Protein coding, Cyclin A1 [105, 106]                                                   | <b><i>PTBP1P</i></b>           | Pseudogene, Polypyrimidine Tract Binding Protein 1 Pseudogene [105, 106]             |
| <b><i>DEFB1</i></b>      | Protein coding, Defensin Beta 1 [105, 106]                                             | <b><i>EIF3CL</i></b>           | Protein coding, Eukaryotic Translation Initiation Factor 3 Subunit C Like [105, 106] |
| <b><i>AC104837.2</i></b> | Processed pseudogenes [107]                                                            | <b><i>KIF4CP</i></b>           | Pseudogene, Kinesin Family                                                           |

|                   |                                                               |                   |                                                                                      |
|-------------------|---------------------------------------------------------------|-------------------|--------------------------------------------------------------------------------------|
|                   |                                                               |                   | Member 4C, Pseudogene [105, 106]                                                     |
| <i>AC020765.1</i> | Processed pseudogenes [107]                                   | <i>NPIPA7</i>     | Protein coding, Nuclear Pore Complex Interacting Protein Family Member A7 [105, 106] |
| <i>AC005943.1</i> | nonsense mediated decay [107]                                 | <i>AC091390.3</i> | unprocessed pseudogene [107]                                                         |
| <i>EXOC3L1</i>    | Protein coding, Exocyst Complex Component 3 Like 1 [105, 106] | <i>GLYATL1B</i>   | Protein coding, Glycine-N-Acyltransferase Like 1B [105, 106]                         |
| <i>CXCL11</i>     | Protein coding, C-X-C Motif Chemokine Ligand 11 [105, 106]    | <i>AC026436.1</i> | Processed pseudogenes [107]                                                          |

292

### 293 3.2.5. Biological annotation - Gene Enrichment analysis

294 We queried all significantly up and down regulated genes obtained from DGE analysis to the  
 295 Enrichr search engine independently. The resulting bar plots represent the top enriched terms  
 296 for upregulated genes (Figures 5, Supplementary Figure S2-S4) and downregulated genes  
 297 (Figures 6, Supplementary Figure S5). We also extracted the complete results of all enriched  
 298 terms for both upregulated (see Table S6-S21, Supplementary File 2) and downregulated  
 299 gene sets (see Table S22-S36, Supplementary File 2) as tables. Besides, we also studied the  
 300 significant terms and searched in the literature whether these are associated with COVID-19  
 301 pathogenesis previously. The key terms are briefly explained below:

#### 302 3.2.5.1. Gene Set Enrichment Analysis of upregulated Genes

##### 303 Association with the viral infection and inflammatory response

304 Immune response terms that were found to be enriched for upregulated gene set include  
 305 decreased interleukin-12b secretion MP:0008670; decreased B cell proliferation  
 306 MP:0005093; abnormal interleukin level MP:0008751; impaired natural killer cell-mediated  
 307 cytotoxicity MP:0005070; increased prostaglandin level MP:0009814; lymph node  
 308 hyperplasia MP:0008102, Oncostatin M Signalling Pathway WP2374. Further, enriched



309 terms found to associated with response to viral infection like Type II interferon signaling  
310 (I.F.N.G.) (WP619), IL-18 signaling pathway (WP4754), IL8 signaling (WP4754), Structural  
311 Pathway of Interleukin 1 (IL-1) (WP2637), IL-6 signaling pathway (WP364), decreased  
312 interferon-alpha secretion (MP:0008563), IL-4 signaling pathway (WP395), decreased  
313 interferon-1 beta secretion (MP:0008658), abnormal T-helper 2 physiology (MP:0005466),  
314 abnormal macrophage physiology (MP:0002451), abnormal T-helper 1 physiology  
315 (MP:0005465), abnormal granulocyte physiology (MP:0002462), sepsis (MP:0005044).  
316 While the enriched terms related to anti-inflammatory and immune response are Activation of  
317 NLRP3 Inflammasome by SARS-CoV-2 (WP4876), abnormal inflammatory response  
318 (MP:0001845), IL-10 Anti-inflammatory Signaling Pathway WP4495.

### 319 **Association with secondary infections**

320 Interestingly, we found the enrichment of upregulated genes with terms that are associated  
321 with various infections other than COVID-19. These enriched terms are Influenza A, Epstein-  
322 Barr virus infection, Kaposi sarcoma-associated herpesvirus infection, *Staphylococcus aureus*  
323 infection, Measles, Human immunodeficiency virus 1 infection, Hepatitis C, increased  
324 susceptibility to bacterial infection (MP:0002412), Recurrent gram-negative bacterial  
325 infections (HP:0005420), increased susceptibility to fungal infection (MP:0005399),  
326 increased susceptibility to bacterial infection (MP:0002412), increased susceptibility to  
327 Picornaviridae infection (MP:0020937), Kaposi sarcoma-associated herpesvirus infection,  
328 increased susceptibility to Riboviria infection (MP:0020913), increased susceptibility to  
329 Herpesvirales infection (MP:0020916). Enrichment terms related to nutrients for upregulated  
330 gene set were Copper homeostasis WP3286, Vitamin B12 Disorders WP4271, and Zinc  
331 homeostasis WP3529. Iron homeostasis enrichment terms in upregulated gene sets are  
332 Ferroptosis WP4313, Folate Metabolism WP176, abnormal iron homeostasis MP:0005637,  
333 decreased spleen iron level MP:0008808, Abnormality of iron homeostasis (HP:0011031).

### 334 **Association with organs other than the respiratory system**

335 We also observed enriched pathways related to various organs, such as kidney-related  
336 glomerulonephritis MP:0002743; renal glomerular immunoglobulin deposits MP:0020519;  
337 and liver-related increased liver iron level MP:0008807. Heart-related Adrenergic signaling  
338 in cardiomyocytes (KEGG), myocarditis MP:0001856, Extracellular vesicles in the crosstalk  
339 of cardiac cells WP4300, ApoE, and miR-146 in inflammation and atherosclerosis WP3926,  
340 arrhythmogenic right ventricular dysplasia (Diseases) [implication of *JUP* gene in ARVD],  
341 Arrhythmogenic right ventricular cardiomyopathy (KEGG), cholesterol level (OMIM  
342 Diseases) [implication of *VNN1* gene], myocardial infarction (OMIM Diseases) [implication

343 of PSMA6 gene], cardiomyopathy, (OMIM Diseases) [implication of *MYBPC3* gene],  
344 Chronic obstructive pulmonary disease (HP:0006510), Abnormality of lateral ventricle  
345 (HP:0030047), Abnormality of the carotid arteries (HP:0005344); Arteriovenous  
346 malformation (HP:0100026); Arterial thrombosis (HP:0004420). Pathways enriched for the  
347 intestine are "Duodenal and small intestinal stenosis," "abnormal gut flora balance"  
348 MP:0010377, and those related to the skin were hypopigmented skin patches (HP:0001053),  
349 Urticaria (HP:0001025), Recurrent skin infections (HP:0001581), Hyper melanotic macule  
350 (HP:0001034), Recurrent bacterial skin infections (HP:0005406), Eczematoid dermatitis  
351 (HP:0000976) skin hemorrhage MP:0011514. Brain related neurological and behavioral  
352 pathways found were Inappropriate behavior (HP:0000719), Personality changes  
353 (HP:0000751), Diminished motivation (HP:0000745), Dementia (HP:0000726), Memory  
354 impairment (HP:0002354), Restlessness (HP:0000711), Vertigo (HP:0002321),  
355 Neuroinflammation WP4919, Galanin receptor pathway WP4970, Meningitis (HP:0001287).

#### 356 **Association with male infertility**

357 Enrichment analysis of upregulated genes set shown the association with the male infertility  
358 WP4673, Abnormality of the preputium (HP:0100587), and Erectile abnormalities  
359 (HP:0100639).

#### 360 **Association with other important pathways for understanding host response**

361 Further, we found the enrichment of upregulated genes in Ferritin, an inflammatory marker  
362 used in COVID-19 prognosis, Transcriptional cascade regulating adipogenesis WP4211,  
363 Fibrin Complement Receptor 3 Signalling Pathway WP4136. Other WikiPathway that are  
364 observed to be significantly upregulated in severe patients are IL1 and megakaryocytes in  
365 obesity (WP2865); Adipogenesis (WP236); Non-genomic actions of 1,25 dihydroxy vitamin  
366 D3 (WP4341); Vitamin D Receptor Pathway (WP2877); Myometrial relaxation and  
367 contraction pathways (WP289); Extracellular vesicles in the crosstalk of cardiac cells  
368 (WP4300). Pathways enriched related to blood cells are thrombocytopenia MP:0003179;  
369 abnormal myelopoiesis MP:0001601; impaired hematopoiesis MP:0001606; increased spleen  
370 weight MP:0004952. Descartes\_Cell\_Tissue\_2021 shows Myeloid cells, Microglia, Antigen-  
371 presenting cells in the Thymus, Erythroblasts, Megakaryocytes in the Heart, Corneal and  
372 conjunctival epithelial cells in Eye, Vascular endothelial cells enrichment. Jensen diseases  
373 database indicates the association of upregulated genes with Arthritis, Peritonitis, Vasculitis,  
374 Periodontitis, Tularemia, Lupus Erythematosus, Boutonneuse fever, Hemochromatosis. The  
375 enriched GO cellular function(s) were azurophil granule (GO:0042582); ficolin-1-rich  
376 granule (GO:0101002); platelet alpha granule (GO:0031091). KEGG Human 2021 terms

377 enriched in upregulated gene sets are NOD-like receptor signaling pathway; Osteoclast  
378 differentiation; Legionellosis; Lipid and atherosclerosis; Staphylococcus aureus infection;  
379 Measles; C-type lectin receptor signaling pathway; TNF signaling pathway; Rheumatoid  
380 arthritis; IL-17 signaling pathway.

### 381 **3.2.5.2. Gene Set Enrichment Analysis of downregulated Genes**

382 We observed that downregulated genes in severe patients are significantly associated with  
383 Hematopoietic cell lineage and Primary immunodeficiency. Besides, they were involved in  
384 lipid metabolism, adaptive immune response, translation, recurrent respiratory infections,  
385 heme biosynthetic pathways, etc.

#### 386 **Association with metabolic pathways**

387 Notably, some of the downregulated genes were found to be associated with metabolic  
388 pathways such as Arachidonic acid metabolism, Inositol phosphate metabolism, Histidine  
389 metabolism, Glycosylphosphatidylinositol (GPI)-anchor biosynthesis, Linoleic acid  
390 metabolism, beta-Alanine metabolism, Fructose, and mannose metabolism,  
391 Glycerophospholipid metabolism, Carbohydrate digestion, and absorption, through  
392 enrichment was not significant.

#### 393 **Association with Adaptive immune Response**

394 Next, we observed downregulated genes are significantly enriched in GO biological  
395 processes that are associated with adaptive immune response, including regulation of antigen  
396 receptor-mediated signaling pathway (GO:0050854), response to interleukin-6  
397 (GO:0070741), adaptive immune response based on somatic recombination of immune  
398 receptors built from immunoglobulin superfamily domains (GO:0002460), regulation of B  
399 cell receptor signaling pathway (GO:0050855), regulation of antigen receptor-mediated  
400 signaling pathway (GO:0050854), response to interleukin-6 (GO:0070741), adaptive immune  
401 response based on somatic recombination of immune receptors built from immunoglobulin  
402 superfamily domains (GO:0002460), regulation of B cell receptor signaling pathway  
403 (GO:0050855).

#### 404 **Association with translation**

405 Some of the downregulated genes, i.e., *EIF3CL*, *EIF4B*, *EIF5ALI*, *PASK*, were found to be  
406 involved (although not significantly enriched) in translation processes such as the formation  
407 of the translation preinitiation complex (GO:0001731), regulation of translational initiation  
408 (GO:0006446), positive regulation of translation (GO:0045727), regulation of translational

409 elongation (GO:0006448), cytoplasmic translational initiation (GO:0002183), translation  
410 Factors WP107.

411 **Association with recurrent respiratory diseases and abnormal Heme biosynthesis**

412 Recurrent lower respiratory tract infections (HP:0002783), Agammaglobulinemia  
413 (HP:0004432), Abnormality of the heme biosynthetic pathway (HP:0010472).

414 **Other signaling pathways**

415 Further, the TGF-beta signaling pathway, Notch signaling pathway, and Ferroptosis pathways  
416 were also associated with downregulated genes. Besides, downregulated genes are related to  
417 Cutaneous finger syndactyly (HP:0010554), Cutaneous syndactyly (HP:0012725), and  
418 Increased number of teeth (HP:0011069).

419

A. KEGG 2021 Human

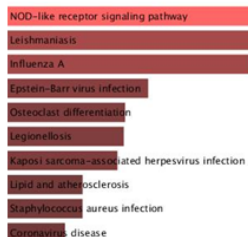

B. WikiPathway 2021 Human

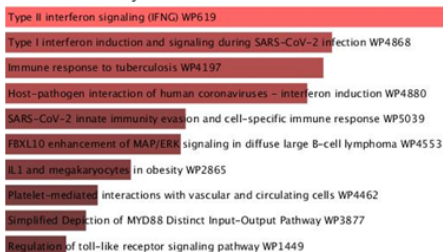

C. GO Biological Process 2021

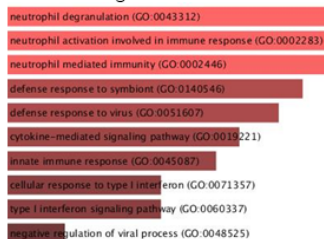

D. Jensen DISEASES

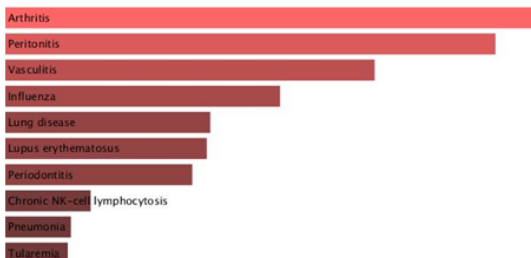

420

### E. Human Phenotype Ontology

Systemic lupus erythematosus (HP:0002725)  
 Abnormality of the peritoneum (HP:0002585)  
 Duodenal stenosis (HP:0100867)  
 Small intestinal stenosis (HP:0012848)  
 Cafe-au-lait spot (HP:0000957)  
 Splenomegaly (HP:0001744)  
 Abnormality of iron homeostasis (HP:0011031)  
 Abnormality of the duodenum (HP:0002246)  
 Abnormality of transition element cation homeostasis (HP:0011030)  
 Increased serum ferritin (HP:0003281)

### F. MGI Mammalian Phenotype Level 4

abnormal macrophage physiology MP:0002451  
 increased susceptibility to bacterial infection MP:0002412  
 abnormal neutrophil physiology MP:0002463  
 decreased susceptibility to induced arthritis MP:0003436  
 decreased interferon-alpha secretion MP:0008563  
 decreased tumor necrosis factor secretion MP:0008561  
 decreased interleukin-8 secretion MP:0008706  
 abnormal iron homeostasis MP:0005637  
 increased tumor necrosis factor secretion MP:0008560  
 increased cell proliferation MP:0005154

### G. Descartes Cell Types and Tissue

Myeloid cells in Pancreas  
 Microglia in Cerebellum  
 Myeloid cells in Intestine  
 Microglia in Cerebrum  
 Myeloid cells in Kidney  
 Myeloid cells in Adrenal  
 Myeloid cells in Lung  
 Antigen presenting cells in Thymus  
 Myeloid cells in Liver  
 Erythroblasts in Pancreas

### H. OMIM Disease

malaria  
 leukemia  
 blood  
 systemic lupus erythematosus  
 gastric cancer  
 anemia  
 falciparum malaria  
 charcot-marie-tooth disease  
 pancreatic cancer  
 dementia

421

422

Figure 4: Ontologies and pathways upregulated in DESeq2 analysis of severe and asymptomatic

423

COVID-19 subjects using Enrichr database.

424

### A. COVID-19 Related Gene Sets

Top 500 down genes for SARS-CoV-2 infection in Rhesus macaques at Group 2 dose in PBMCs at 2 DPI from GSE156701  
 Top 500 down genes for SARS-CoV-2 infection in Rhesus macaques at Group 2 dose in PBMCs at 10 DPI from GSE15670  
 Top 500 down genes for SARS-CoV-2 early infection in human female blood from GSE161731  
 Top 500 down genes for SARS-CoV-2 infection in Rhesus macaques at Group 1 dose in Bronchoalveolar Lavage at 1 DPI  
 Top 500 down genes for SARS-CoV-2 infection in Rhesus macaques at Group 1 dose in PBMCs at 7 DPI from GSE156701  
 COVID-19 patients PBMC down  
 SARS coronavirus nsp9-pp1a/ pp1ab (gene: orf1ab) from Virus-Host PPI-P-HIPster 2020  
 Top 500 down genes for SARS-CoV-2 infection in Rhesus macaques at Group 3 dose in PBMCs at 2 DPI from GSE156701  
 Top 500 up genes for SARS-CoV-2 infection in Rhesus macaques at Group 2 dose in Bronchoalveolar Lavage at 4 DPI from GSE156701  
 Top 500 downregulated genes in human nasal epithelial cells with SARS-CoV-2 infection (Mutant, 8 hpi) from GEO GSE110000

### B. GO Biological Process

regulation of antigen receptor-mediated signaling pathway (GO:0050854)  
 response to interleukin-6 (GO:0070741)  
 adaptive immune response based on somatic recombination of immune receptors built from immunoglobulin superfamily (GO:0050855)  
 regulation of B cell receptor signaling pathway (GO:0050855)  
 negative regulation of cardiac muscle cell proliferation (GO:0060044)  
 antigen processing and presentation of lipid antigen via MHC class Ib (GO:0048003)  
 antigen processing and presentation, endogenous lipid antigen via MHC class Ib (GO:0048006)  
 antigen processing and presentation, exogenous lipid antigen via MHC class Ib (GO:0048007)  
 atrial cardiac muscle tissue morphogenesis (GO:0055009)  
 regulation of barbed-end actin filament capping (GO:2000812)

### C. GO Cellular Component

Golgi cis cisterna (GO:0000137)  
 Golgi cisterna membrane (GO:0032580)  
 macropinosome (GO:0044354)  
 pinosome (GO:0044352)  
 T cell receptor complex (GO:0042101)  
 Golgi cisterna (GO:0031985)  
 cis-Golgi network (GO:0005801)  
 desmosome (GO:0030057)  
 gap junction (GO:0005921)  
 catenin complex (GO:0016342)

### D. GO Molecular Function

Notch binding (GO:005112)  
 RNA strand annealing activity (GO:0033592)  
 endogenous lipid antigen binding (GO:0030883)  
 annealing activity (GO:0097617)  
 exogenous lipid antigen binding (GO:0030884)  
 fucose binding (GO:0042806)  
 MHC class I protein complex binding (GO:0023024)  
 NAADP-sensitive calcium-release channel activity (GO:0072345)  
 hemoglobin alpha binding (GO:0031721)  
 chitinase activity (GO:0004568)

425

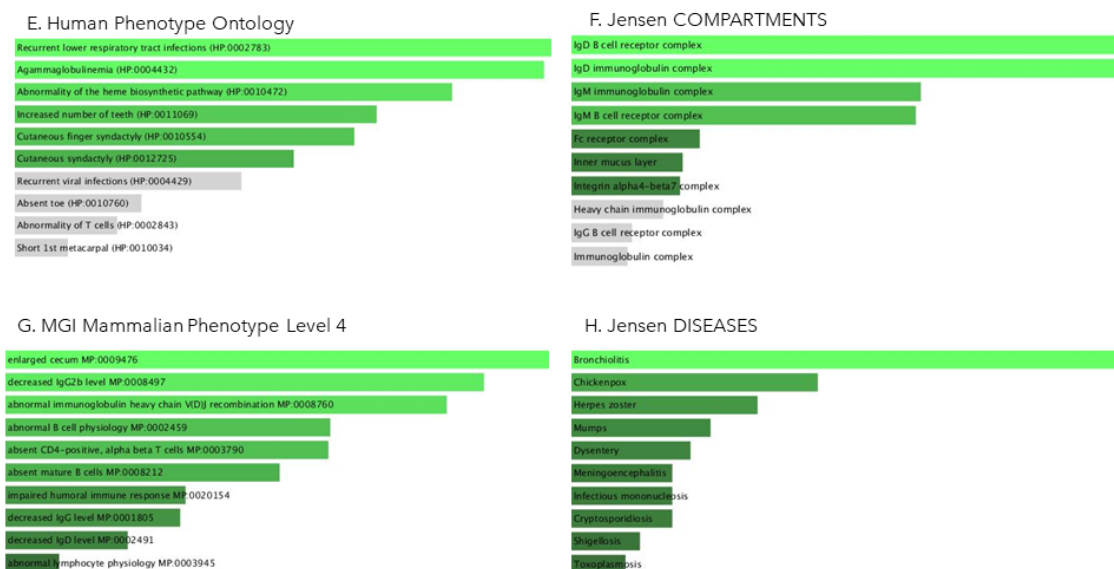

426

427 Figure 6: Ontologies and pathways downregulated in DESeq2 analysis of severe and asymptomatic  
428 COVID-19 subjects using Enrichr database.

429

### 430 Discussion

431 The primary concern with highly transmissible COVID-19 disease is the lack of  
432 understanding of the disease-causing mechanisms, resulting in poor treatments and post  
433 COVID-19 complications [110]. Clinical observations and scientific studies indicate that  
434 SARS-CoV-2 infection impacts not only respiratory organs but also other organs such as the  
435 brain, heart, kidney, gastrointestinal tract, etc. [8, 111-114]. The risk factors for COVID-19  
436 severity include pre-existing comorbidities, particular age group of subjects, demographics,  
437 gender, etc. [5, 8, 23, 115, 116]. The heterogeneous effects of the infection on various  
438 individuals pose a significant hurdle in the therapeutic management of COVID-19 patients.  
439 Thus, it is vital to delineate the molecular alterations occurring in different groups of patients  
440 based on the impact of infections. This study extensively explored the transcriptomics  
441 profiles of two contrasting groups of COVID-19 patients, i.e., severe, and asymptomatic. The  
442 RNA sequencing data is derived from whole blood cells, a pool of immune cells, and  
443 significant biochemical products result of biochemical processes, making it a considerable  
444 tissue sample for transcriptomic profiling. Hence, we believe that the whole blood serves as a  
445 good source for understanding the immunopathology of COVID-19 subjects. Identifying  
446 significant pathways involved in the patients might help manage the severity of the disease.  
447 Exploratory analysis using Principal Component Analysis (PCA) shows distinct  
448 asymptomatic and severe subjects clusters. Subsequently, differential gene expression

449 analysis was performed between these two groups employing the DESeq2. We identified  
450 2,837 genes as significantly differentially expressed between severe and asymptomatic  
451 COVID-19 subjects. To reduce false discovery rate (FDR) and increase statistical  
452 significance, we used a stringent filter (Bonferroni-padj value  $<0.05$  and Log2fold Change  
453 (Log2FC)) and found 1,224 upregulated (Log2FC  $\geq 1.5$  and p-adjusted value  $<0.05$ ) and  
454 268 downregulated (Log2FC  $\leq -1.5$  and p-adjusted value  $<0.05$ ) genes in severe in  
455 comparison to asymptomatic COVID-19 subjects. Further, to understand the alterations at the  
456 molecular and biological level, we queried differentially regulated genes in the Enrichr  
457 database.

458 Our study found pathways known to express in viral response, in general, and specific to  
459 COVID-19 infection. We observed the type II interferon (IFNG) pathway upregulated in  
460 severe subjects. While type I IFNG is generally activated in viral response, studies have  
461 found suppression of Type I IFN in SARS-CoV infections [117, 118]. The enrichment studies  
462 observed an increased population of myeloid cells (in the pancreas, intestine, kidney, lung,  
463 liver) and microglia (in the brain), which form part of the innate immune response against the  
464 virus. These cell types have a known role in phagocytosis and anti-inflammation, biochemical  
465 pathways commonly observed in response to viral infection [119, 120]. Antigen-presenting  
466 cells (A.P.C.) in thymus enriched in severe patients also indicate an immune response to the  
467 virus. G.O. cellular components show increased ficolin and azurophil-rich granules secretion  
468 in severe subjects. These are also associated with the COVID-19 immune response [121-  
469 123]. Neutrophil count increases in COVID-19 infection [115, 124]. Our enrichment analysis  
470 also found neutrophil activation and neutrophil mediated immunity. Neutrophil degranulation  
471 is enhanced in response to inflammatory reactions in the body [125-127]. And previous  
472 studies have also reported increased neutrophil degranulation in response to COVID-19  
473 infection in organisms other than humans [125]. One such study performed on the Rhesus  
474 macaque model shows increased neutrophil degranulation in young subjects compared to old  
475 subjects [125]. As observed in severe patients, we propose that the upregulation of neutrophil  
476 degranulation occurs in response to the disease severity. Our subjects fall in the mean age of  
477 around 45 years, the old age group; we need to compare neutrophil degranulation in COVID-  
478 19 response in an age-dependent study.

479 Further, our analysis observed "negative regulation of viral process" in the upregulated G.O.  
480 biological process, possibly explaining that the increased host immune response (anti-viral)  
481 reduces other viruses' multiplication. The possible reason for this is the activation of the anti-  
482 viral immune response that reduces the risks of other infections. Increased STING (stimulator

483 of interferon genes), which mediates interferon expression, is a known prognosis of COVID-  
484 19 [128]. Interestingly, we also observed that COVID-19 severe patients might have an  
485 increased risk of bacterial, fungal infection compared to asymptomatic patients. This  
486 observation of reduced viral infection but increased secondary infection aligns with previous  
487 studies on COVID-19 patients [129, 130]. The immune response involved in viral and  
488 bacterial infection shares different immune components [131-136]. A study reveals  
489 simultaneous expression of both IFN $\alpha$  and IFN $\gamma$  inhibits the expression of biomarkers  
490 associated with viral and bacterial infection [131]. We believe that the complex interplay of  
491 viral and bacterial response factors and activation of viral response in the host inhibits the  
492 expression of host immune machinery to tackle bacterial infection and might be the probable  
493 reason for increased susceptibility to bacterial infections post COVID-19 infection. Previous  
494 research shows that NOD-like receptor signaling enhanced in response to SARS-CoV-1  
495 infection results in disturbances in microbiota and increased secondary infection [118, 137].  
496 We also observed NOD-like receptor signaling enrichment in the upregulated gene set, which  
497 might indicate gastrointestinal manifestations and increased susceptibility to bacterial  
498 infection in severe patients. This observation needs to be further confirmed by studying the  
499 host response expression induced by infections with various microorganisms.

500 Another significant observation in enriched terms for upregulated genes is the high  
501 coincidence of cardiac complications in COVID-19 patients, as evident in severe COVID-19  
502 patients [17, 29]. Our study has observed coagulation dysfunction upregulated in severe  
503 patients, which could be the reason for the cardiac manifestation of COVID-19 infection. As  
504 mentioned previously, we have observed enrichment of Antigen-presenting cells in the  
505 thymus, and there are studies linking the thymus' role in Arrhythmia [138-140]. We have also  
506 confirmed many "Disease-specific laboratory values" upregulated in severe patients. These  
507 are related to immunological response, inflammation response, and hypercoagulable state,  
508 increased aspartate aminotransferase (AST), and alanine aminotransferase (ALT), and  
509 increased interleukin 6 (IL-6), and decreased thrombocytes, reduced blood sodium.

510 We have also found that COVID 19 disease severity might impact fertility in the patients. It  
511 is known that ACE2 receptors are present in human male testicles [141], but the studies  
512 related to COVID-19's impact on testicular functionality are contradictory [142-144]. Studies  
513 done to detect viral RNA in semen showed different results, with the majority indicating the  
514 absence of SARS-CoV-2 RNA [145-149]. So, we propose that if the viral particles are absent  
515 in the semen, the possibility of infertility in COVID-19 patients could be an inflammatory  
516 response to COVID-19 infection [150]. The enrichment pathways related to downregulated



517 gene sets also support the previous research findings, such as reduced notch binding  
518 signaling, absent mature B cells, CD4+, alpha, and beta T cells, etc. [125, 151].

519 As COVID-19 disease has a multifactorial response on the body, we need more clinical  
520 features for prognosis, which can help us manage the diverse impact of COVID-19 on health.

521 To address future novel virus disease management, we must not limit ourselves to real-time  
522 therapeutics. Instead, we must continuously build the concepts of generalized host response  
523 and disease progression on diverse tissues and subject groups.

524

## 525 **Conclusion**

526 Our unpreparedness with SARS-CoV-2 indicates the need for more stringent research to help  
527 us understand disease progression and devise strategies for other such outbreaks in the future.

528 Our comparative study based on two contrasting COVID-19 infection conditions, i.e. severe  
529 and asymptomatic patients identified the alteration of key pathways and biological processes

530 associated with various comorbidities. We observed upregulation of viral-specific immune  
531 response and inflammatory pathways. Besides, heightened organ-specific responses related to

532 blood, heart, brain, intestine, and kidney enriched in severe subjects not limited to respiratory  
533 organs. Also, our study suggests that severe COVID-19 subjects become more prone to

534 bacterial infections and less prone to viral infections. Besides, we found the downregulation  
535 of lipid metabolism, adaptive immune response, translation, heme-biosynthetic pathways, etc.

536 The major pathways highlighted in our study are associated with cardiac complications,  
537 autoinflammatory conditions, secondary infections, iron homeostasis and anemia, lipid

538 metabolism, male infertility, etc. These altered pathways in severe patients might be  
539 indicative of post-COVID effects. We anticipate our study will facilitate clinicians in

540 managing COVID-19 patients and post-COVID complications, essentially, researchers in  
541 finding better therapeutic targets. However, analyzing more samples in both groups will help

542 validate our findings.

## 543 **Limitation of the Study**

544 We face multiple challenges in the transcriptomic analysis of COVID-19 patients. There are  
545 limited host response data available. The lack of diversity of data (tissues, demographics,

546 patient clinical characteristics) is also another limitation. Also, we need more data available  
547 from infection studies to establish a correlation between secondary infection and SARS-CoV-

548 2. The study can be improved in the following ways. As observed in COVID-19 patients, the

549 immune response components also vary during infection, and hence many of these  
550 complications may also change with the course of disease progression.

### 551 **Authors contribution**

---

552 Sen P performed the data analysis, produced the figures, and wrote the manuscript. Kaur H  
553 proposed the project, reviewed the data, provided assistance with analysis, drafted the  
554 manuscript, and supervised the whole project.

### 555 **Acknowledgment**

---

556 The authors are thankful to the OmicsLogic Research fellowship program, Pine Biotech, Inc,  
557 U.S.A.

### 558 **Funding**

---

559 No funding

### 560 **Conflict of Interest**

---

561 The authors declare no financial and non-financial conflict of interest.

### 562 **Supplementary Data**

---

563 Supplementary File 1: Supplementary Figures

564 Supplementary File 2: Supplementary Tables

565

### 566 **References**

---

567

- 568 [1] Timeline: WHO's COVID-19 response, World Health Organization.  
569 [2] W. Director-General, WHO Director-General's opening remarks at the media briefing on  
570 COVID-19 - 11 March 2020, World Health Organization, 2020.  
571 [3] A.E. Gorbalenya, S.C. Baker, R.S. Baric, R.J. de Groot, C. Drosten, A.A. Gulyaeva, B.L.  
572 Haagmans, C. Lauber, A.M. Leontovich, B.W. Neuman, D. Penzar, S. Perlman, L.L.M. Poon,  
573 D.V. Samborskiy, I.A. Sidorov, I. Sola, J. Ziebuhr, V. Coronaviridae Study Group of the  
574 International Committee on Taxonomy of, The species Severe acute respiratory syndrome-  
575 related coronavirus: classifying 2019-nCoV and naming it SARS-CoV-2, *Nature*  
576 *Microbiology*, 5 (2020) 536-544.  
577 [4] Worldometers.info, Worldometer: COVID-19 CORONAVIRUS PANDEMIC, Dover,  
578 Delaware, U.S.A.  
579 [5] T. Asselah, D. Durantel, E. Pasmant, G. Lau, R.F. Schinazi, COVID-19: Discovery,  
580 diagnostics and drug development, *J Hepatol*, 74 (2021) 168-184.  
581 [6] P. Zhou, X.L. Yang, X.G. Wang, B. Hu, L. Zhang, W. Zhang, H.R. Si, Y. Zhu, B. Li, C.L.  
582 Huang, H.D. Chen, J. Chen, Y. Luo, H. Guo, R.D. Jiang, M.Q. Liu, Y. Chen, X.R. Shen, X.  
583 Wang, X.S. Zheng, K. Zhao, Q.J. Chen, F. Deng, L.L. Liu, B. Yan, F.X. Zhan, Y.Y. Wang,

- 584 G.F. Xiao, Z.L. Shi, A pneumonia outbreak associated with a new coronavirus of probable  
585 bat origin, *Nature*, 579 (2020) 270-273.
- 586 [7] J. Zhang, T. Xiao, Y. Cai, B. Chen, Structure of SARS-CoV-2 spike protein, *Current*  
587 *Opinion in Virology*, 50 (2021) 173-182.
- 588 [8] S. Zaim, J.H. Chong, V. Sankaranarayanan, A. Harky, COVID-19 and Multiorgan  
589 Response, *Current Problems in Cardiology*, 45 (2020) 100618.
- 590 [9] C.I. Paules, H.D. Marston, A.S. Fauci, Coronavirus Infections—More Than Just the  
591 Common Cold, *JAMA*, 323 (2020) 707-708.
- 592 [10] L. Guruprasad, Human SARS CoV-2 spike protein mutations, *Proteins: Structure,*  
593 *Function, and Bioinformatics*, 89 (2021) 569-576.
- 594 [11] G. Dudas, S.L. Hong, B.I. Potter, S. Calvignac-Spencer, F.S. Niatou-Singa, T.B.  
595 Tombolomako, T. Fuh-Neba, U. Vickos, M. Ulrich, F.H. Leendertz, K. Khan, C. Huber, A.  
596 Watts, I. Olendraite, J. Snijder, K.N. Wijnant, A. Bonvin, P. Martres, S. Behillil, A. Ayoub, A.  
597 M.F. Maidadi, D.M. Djomsi, C. Godwe, C. Butel, A. Simaitis, M. Gabrielaite, M. Katenaite, R.  
598 Norvilas, L. Raugaite, G.W. Koyaweda, J.K. Kandou, R. Jonikas, I. Nasvytiene, Z.  
599 Zemeckiene, D. Gecys, K. Tamusauskaite, M. Norkiene, E. Vasiliunaite, D. Ziogiene, A.  
600 Timinskas, M. Sukys, M. Sarauskas, G. Alzbutas, A.A. Aziza, E.K. Lusamaki, J.M. Cigolo,  
601 F.M. Mawete, E.L. Lofiko, P.M. Kingebeni, J.M. Tamfum, M.R.D. Belizaire, R.G. Essomba,  
602 M.C.O. Assoumou, A.B. Mboringong, A.B. Dieng, D. Juozapaite, S. Hosch, J. Obama, M.O.  
603 Ayekaba, D. Naumovas, A. Pautienius, C.D. Rafai, A. Vitkauskiene, R. Ugenskiene, A.  
604 Gedvilaite, D. Cereskevicius, V. Lesauskaite, L. Zemaitis, L. Griskevicius, G. Baele,  
605 Emergence and spread of SARS-CoV-2 lineage B.1.620 with variant of concern-like  
606 mutations and deletions, *Nat Commun*, 12 (2021) 5769.
- 607 [12] S. Kumar, T.S. Thambiraja, K. Karuppanan, G. Subramaniam, Omicron and Delta  
608 variant of SARS-CoV-2: A comparative computational study of spike protein, *Journal of*  
609 *Medical Virology*, 94 (2022) 1641-1649.
- 610 [13] J.M. Fegert, B. Vitiello, P.L. Plener, V. Clemens, Challenges and burden of the  
611 Coronavirus 2019 (COVID-19) pandemic for child and adolescent mental health: a narrative  
612 review to highlight clinical and research needs in the acute phase and the long return to  
613 normality, *Child Adolesc Psychiatry Ment Health*, 14 (2020) 20.
- 614 [14] Therapeutics and COVID-19: living guideline, WHO-2019-nCoV-therapeutics-2022.2,  
615 World Health Organization, 2022.
- 616 [15] S.-S. Jean, P.-R. Hsueh, Old and re-purposed drugs for the treatment of COVID-19,  
617 *Expert Review of Anti-infective Therapy*, 18 (2020) 843-847.
- 618 [16] M. Ballou, C.L. Haga, Why Do Some People Develop Serious COVID-19 Disease After  
619 Infection, While Others Only Exhibit Mild Symptoms?, *J Allergy Clin Immunol Pract*, 9 (2021)  
620 1442-1448.
- 621 [17] B. Bakhshandeh, Z. Jahanafrooz, A. Abbasi, M.B. Goli, M. Sadeghi, M.S. Mottaqi, M.  
622 Zamani, Mutations in SARS-CoV-2; Consequences in structure, function, and pathogenicity  
623 of the virus, *Microb Pathog*, 154 (2021) 104831.
- 624 [18] P.M. Varghese, A.G. Tsolaki, H. Yasmin, A. Shastri, J. Ferluga, M. Vatish, T. Madan, U.  
625 Kishore, Host-pathogen interaction in COVID-19: Pathogenesis, potential therapeutics and  
626 vaccination strategies, *Immunobiology*, 225 (2020) 152008.
- 627 [19] M. Fung, J.M. Babik, COVID-19 in Immunocompromised Hosts: What We Know So Far,  
628 *Clin Infect Dis*, 72 (2021) 340-350.
- 629 [20] C. Wu, X. Chen, Y. Cai, J. Xia, X. Zhou, S. Xu, H. Huang, L. Zhang, X. Zhou, C. Du, Y.  
630 Zhang, J. Song, S. Wang, Y. Chao, Z. Yang, J. Xu, X. Zhou, D. Chen, W. Xiong, L. Xu, F.  
631 Zhou, J. Jiang, C. Bai, J. Zheng, Y. Song, Risk Factors Associated With Acute Respiratory  
632 Distress Syndrome and Death in Patients With Coronavirus Disease 2019 Pneumonia in  
633 Wuhan, China, *JAMA Intern Med*, 180 (2020) 934-943.
- 634 [21] J. Yang, Y. Zheng, X. Gou, K. Pu, Z. Chen, Q. Guo, R. Ji, H. Wang, Y. Wang, Y. Zhou,  
635 Prevalence of comorbidities and its effects in patients infected with SARS-CoV-2: a  
636 systematic review and meta-analysis, *Int J Infect Dis*, 94 (2020) 91-95.
- 637 [22] L. Wallentin, J. Lindback, N. Eriksson, Z. Hijazi, J.W. Eikelboom, M.D. Ezekowitz, C.B.  
638 Granger, R.D. Lopes, S. Yusuf, J. Oldgren, A. Siegbahn, Angiotensin-converting enzyme 2

- 639 (ACE2) levels in relation to risk factors for COVID-19 in two large cohorts of patients with  
640 atrial fibrillation, *Eur Heart J*, 41 (2020) 4037-4046.
- 641 [23] Y. Chen, S.L. Klein, B.T. Garibaldi, H. Li, C. Wu, N.M. Osevala, T. Li, J.B. Margolick, G.  
642 Pawelec, S.X. Leng, Aging in COVID-19: Vulnerability, immunity and intervention, *Ageing*  
643 *Res Rev*, 65 (2021) 101205.
- 644 [24] K. McIntosh, COVID-19: Epidemiology, virology, and prevention, 2022.
- 645 [25] N. van Doremalen, T. Bushmaker, D.H. Morris, M.G. Holbrook, A. Gamble, B.N.  
646 Williamson, A. Tamin, J.L. Harcourt, N.J. Thornburg, S.I. Gerber, J.O. Lloyd-Smith, E. de  
647 Wit, V.J. Munster, Aerosol and Surface Stability of SARS-CoV-2 as Compared with SARS-  
648 CoV-1, *N Engl J Med*, 382 (2020) 1564-1567.
- 649 [26] H.A. Rothan, S.N. Byrareddy, The epidemiology and pathogenesis of coronavirus  
650 disease (COVID-19) outbreak, *J Autoimmun*, 109 (2020) 102433.
- 651 [27] B. Brogna, C. Brogna, M. Petrillo, A.M. Conte, G. Benincasa, L. Montano, M. Piscopo,  
652 SARS-CoV-2 Detection in Fecal Sample from a Patient with Typical Findings of COVID-19  
653 Pneumonia on CT but Negative to Multiple SARS-CoV-2 RT-PCR Tests on Oropharyngeal  
654 and Nasopharyngeal Swab Samples, *Medicina (Kaunas)*, 57 (2021).
- 655 [28] D.L. Jones, M.Q. Baluja, D.W. Graham, A. Corbishley, J.E. McDonald, S.K. Malham,  
656 L.S. Hillary, T.R. Connor, W.H. Gaze, I.B. Moura, M.H. Wilcox, K. Farkas, Shedding of  
657 SARS-CoV-2 in feces and urine and its potential role in person-to-person transmission and  
658 the environment-based spread of COVID-19, *Sci Total Environ*, 749 (2020) 141364.
- 659 [29] C. Huang, Y. Wang, X. Li, L. Ren, J. Zhao, Y. Hu, L. Zhang, G. Fan, J. Xu, X. Gu, Z.  
660 Cheng, T. Yu, J. Xia, Y. Wei, W. Wu, X. Xie, W. Yin, H. Li, M. Liu, Y. Xiao, H. Gao, L. Guo, J.  
661 Xie, G. Wang, R. Jiang, Z. Gao, Q. Jin, J. Wang, B. Cao, Clinical features of patients  
662 infected with 2019 novel coronavirus in Wuhan, China, *Lancet*, 395 (2020) 497-506.
- 663 [30] J. Wang, M. Jiang, X. Chen, L.J. Montaner, Cytokine storm and leukocyte changes in  
664 mild versus severe SARS-CoV-2 infection: Review of 3939 COVID-19 patients in China and  
665 emerging pathogenesis and therapy concepts, *J Leukoc Biol*, 108 (2020) 17-41.
- 666 [31] L. Sher, Post-COVID syndrome and suicide risk, *QJM*, 114 (2021) 95-98.
- 667 [32] K.A. Scordo, M.M. Richmond, N. Munro, Post-COVID-19 Syndrome: Theoretical Basis,  
668 Identification, and Management, *AACN Adv Crit Care*, 32 (2021) 188-194.
- 669 [33] C.A. Devaux, J.M. Rolain, D. Raoult, ACE2 receptor polymorphism: Susceptibility to  
670 SARS-CoV-2, hypertension, multi-organ failure, and COVID-19 disease outcome, *J Microbiol*  
671 *Immunol Infect*, 53 (2020) 425-435.
- 672 [34] T. Klopfenstein, N.J. Kadiane-Oussou, L. Toko, P.Y. Royer, Q. Lepiller, V. Gendrin, S.  
673 Zayet, Features of anosmia in COVID-19, *Med Mal Infect*, 50 (2020) 436-439.
- 674 [35] C. Faes, S. Abrams, D. Van Beckhoven, G. Meyfroidt, E. Vlieghe, N. Hens, B.C.G.o.C.-  
675 H. Surveillance, Time between Symptom Onset, Hospitalisation and Recovery or Death:  
676 Statistical Analysis of Belgian COVID-19 Patients, *International Journal of Environmental*  
677 *Research and Public Health*, 17 (2020) 7560.
- 678 [36] J.P. Rogers, E. Chesney, D. Oliver, T.A. Pollak, P. McGuire, P. Fusar-Poli, M.S. Zandi,  
679 G. Lewis, A.S. David, Psychiatric and neuropsychiatric presentations associated with severe  
680 coronavirus infections: a systematic review and meta-analysis with comparison to the  
681 COVID-19 pandemic, *Lancet Psychiatry*, 7 (2020) 611-627.
- 682 [37] B. Lamprecht, [Is there a post-COVID syndrome?], *Pneumologie (Berl)*, 17 (2020) 398-  
683 405.
- 684 [38] C. Fernandez-de-Las-Penas, D. Palacios-Cena, V. Gomez-Mayordomo, M.L. Cuadrado,  
685 L.L. Florencio, Defining Post-COVID Symptoms (Post-Acute COVID, Long COVID,  
686 Persistent Post-COVID): An Integrative Classification, *Int J Environ Res Public Health*, 18  
687 (2021).
- 688 [39] A. Carfi, R. Bernabei, F. Landi, C.-P.-A.C.S.G. Gemelli Against, Persistent Symptoms in  
689 Patients After Acute COVID-19, *JAMA*, 324 (2020) 603-605.
- 690 [40] E. Garrigues, P. Janvier, Y. Kherabi, A. Le Bot, A. Hamon, H. Gouze, L. Doucet, S.  
691 Berkani, E. Oliosi, E. Mallart, F. Corre, V. Zarrouk, J.D. Moyer, A. Galy, V. Honsel, B. Fantin,  
692 Y. Nguyen, Post-discharge persistent symptoms and health-related quality of life after  
693 hospitalization for COVID-19, *J Infect*, 81 (2020) e4-e6.

- 694 [41] P.-I. Lee, P.-R. Hsueh, Emerging threats from zoonotic coronaviruses-from SARS and  
695 MERS to 2019-nCoV, *Journal of Microbiology, Immunology and Infection*, 53 (2020) 365-  
696 367.
- 697 [42] M. Hoffmann, H. Kleine-Weber, S. Schroeder, N. Kruger, T. Herrler, S. Erichsen, T.S.  
698 Schiergens, G. Herrler, N.H. Wu, A. Nitsche, M.A. Muller, C. Drosten, S. Pohlmann, SARS-  
699 CoV-2 Cell Entry Depends on ACE2 and TMPRSS2 and Is Blocked by a Clinically Proven  
700 Protease Inhibitor, *Cell*, 181 (2020) 271-280 e278.
- 701 [43] M.M. Lamers, J. Beumer, J. van der Vaart, K. Knoops, J. Puschhof, T.I. Breugem,  
702 R.B.G. Ravelli, J. Paul van Schayck, A.Z. Mykytyn, H.Q. Duimel, E. van Donselaar, S.  
703 Riesebosch, H.J.H. Kuijpers, D. Schipper, W.J. van de Wetering, M. de Graaf, M.  
704 Koopmans, E. Cuppen, P.J. Peters, B.L. Haagmans, H. Clevers, SARS-CoV-2 productively  
705 infects human gut enterocytes, *Science*, 369 (2020) 50-54.
- 706 [44] I. Hamming, W. Timens, M.L. Bulthuis, A.T. Lely, G. Navis, H. van Goor, Tissue  
707 distribution of ACE2 protein, the functional receptor for SARS coronavirus. A first step in  
708 understanding SARS pathogenesis, *J Pathol*, 203 (2004) 631-637.
- 709 [45] F. Li, Receptor recognition and cross-species infections of SARS coronavirus, *Antiviral  
710 Res*, 100 (2013) 246-254.
- 711 [46] W. Sungnak, N. Huang, C. Becavin, M. Berg, R. Queen, M. Litvinukova, C. Talavera-  
712 Lopez, H. Maatz, D. Reichart, F. Sampaziotis, K.B. Worlock, M. Yoshida, J.L. Barnes,  
713 H.C.A.L.B. Network, SARS-CoV-2 entry factors are highly expressed in nasal epithelial cells  
714 together with innate immune genes, *Nat Med*, 26 (2020) 681-687.
- 715 [47] T. Magrone, M. Magrone, E. Jirillo, Focus on Receptors for Coronaviruses with Special  
716 Reference to Angiotensin- Converting Enzyme 2 as a Potential Drug Target - A Perspective,  
717 *Endocr Metab Immune Disord Drug Targets*, 20 (2020) 807-811.
- 718 [48] J.C.-F. Meredith Wadman, Jocelyn Kaiser, Catherine Maticic, How does coronavirus  
719 kill? Clinicians trace a ferocious rampage through the body, from brain to toes. [Jun;2020 ];  
720 2020, *Science*, 2020.
- 721 [49] Y. Su, D. Chen, D. Yuan, C. Lausted, J. Choi, C.L. Dai, V. Voillet, V.R. Duvvuri, K.  
722 Scherler, P. Troisch, P. Baloni, G. Qin, B. Smith, S.A. Kornilov, C. Rostomily, A. Xu, J. Li, S.  
723 Dong, A. Rothchild, J. Zhou, K. Murray, R. Edmark, S. Hong, J.E. Heath, J. Earls, R. Zhang,  
724 J. Xie, S. Li, R. Roper, L. Jones, Y. Zhou, L. Rowen, R. Liu, S. Mackay, D.S. O'Mahony,  
725 C.R. Dale, J.A. Wallick, H.A. Algren, M.A. Zager, I.S.-S.C.B. Unit, W. Wei, N.D. Price, S.  
726 Huang, N. Subramanian, K. Wang, A.T. Magis, J.J. Hadlock, L. Hood, A. Aderem, J.A.  
727 Bluestone, L.L. Lanier, P.D. Greenberg, R. Gottardo, M.M. Davis, J.D. Goldman, J.R. Heath,  
728 Multi-Omics Resolves a Sharp Disease-State Shift between Mild and Moderate COVID-19,  
729 *Cell*, 183 (2020) 1479-1495 e1420.
- 730 [50] NCBI, NCBI Visual Data Dashboard.
- 731 [51] COVID Data Tracker, Centers for Disease Control and Prevention, Atlanta, GA: US  
732 Department of Health and Human Services, CDC.
- 733 [52] E. Mathieu, H. Ritchie, E. Ortiz-Ospina, M. Roser, J. Hasell, C. Appel, C. Giattino, L.  
734 Rodes-Guirao, Author Correction: A global database of COVID-19 vaccinations, *Nat Hum  
735 Behav*, 5 (2021) 956-959.
- 736 [53] A. Talwai, V. Wing, Y. Itzkovich, A. Galaznik, A. Chatterjee, R. Jain, J. LaBonte, PIN83  
737 The COVID-19 Research Database: Building One of the Largest PRO Bono Real-World  
738 DATA Repositories, *Value in Health*, 24 (2021) S121.
- 739 [54] L. Lu Wang, K. Lo, Y. Chandrasekhar, R. Reas, J. Yang, D. Eide, K. Funk, R. Kinney, Z.  
740 Liu, W. Merrill, P. Mooney, D. Murdick, D. Rishi, J. Sheehan, Z. Shen, B. Stilson, A.D. Wade,  
741 K. Wang, C. Wilhelm, B. Xie, D. Raymond, D.S. Weld, O. Etzioni, S. Kohlmeier, COVID-19:  
742 The Covid-19 Open Research Dataset, *ArXiv*, (2020).
- 743 [55] Q. Chen, A. Allot, Z. Lu, LitCovid: an open database of COVID-19 literature, *Nucleic  
744 Acids Res*, 49 (2021) D1534-D1540.
- 745 [56] S. Patiyal, D. Kaur, H. Kaur, N. Sharma, A. Dhall, S. Sahai, P. Agrawal, L. Maryam, C.  
746 Arora, G.P.S. Raghava, A Web-Based Platform on Coronavirus Disease-19 to Maintain  
747 Predicted Diagnostic, Drug, and Vaccine Candidates, *Monoclon Antib Immunodiagn  
748 Immunother*, 39 (2020) 204-216.

- 749 [57] S. Ouyang, Y. Wang, K. Zhou, J. Xia, LitCovid-AGAC: cellular and molecular level  
750 annotation data set based on COVID-19, *Genomics Inform*, 19 (2021) e23.
- 751 [58] C. Holy, S. Shah, N. Elangovanraaj, D. Krishnan, S. Gupta, P. Trivedi, M. Devulapally,  
752 A. Mohapatra, S. Johnston, P. Coplan, PIN117 Identification of Patients with COVID-19  
753 Infection Prior to the New COVID-19 Diagnostic Code - a Premier Database Analysis, *Value*  
754 *in Health*, 23 (2020) S563.
- 755 [59] M. Zettler, A. Gajra, B. Feinberg, PRS30 COVID-19 RAPID Antigen Test False Positives  
756 and False Negatives Reported to the FDA Manufacturer and User Facility Device  
757 Experience Database, *Value in Health*, 24 (2021) S218-S218.
- 758 [60] J. Gong, J. Ou, X. Qiu, Y. Jie, Y. Chen, L. Yuan, J. Cao, M. Tan, W. Xu, F. Zheng, Y.  
759 Shi, B. Hu, A Tool for Early Prediction of Severe Coronavirus Disease 2019 (COVID-19): A  
760 Multicenter Study Using the Risk Nomogram in Wuhan and Guangdong, China, *Clin Infect*  
761 *Dis*, 71 (2020) 833-840.
- 762 [61] A.K. Singh, G. Mishra, A. Maurya, G.T. Kulkarni, R. Awasthi, Biofabrication: An  
763 interesting tool to create in vitro model for COVID-19 drug targets, *Med Hypotheses*, 144  
764 (2020) 110059.
- 765 [62] D.E. Faleiros, W. van den Bos, L. Botto, F. Scarano, TU Delft COVID-app: A tool to  
766 democratize CFD simulations for SARS-CoV-2 infection risk analysis, *Sci Total Environ*, 826  
767 (2022) 154143.
- 768 [63] T. Riffe, E. Acosta, t.C.-D. team, Data Resource Profile: COVerAGE-DB: a global  
769 demographic database of COVID-19 cases and deaths, *International Journal of*  
770 *Epidemiology*, 50 (2021) 390-390f.
- 771 [64] A. Mahdi, P. Błaszczuk, P. Dłotko, D. Salvi, T.-S. Chan, J. Harvey, D. Gurnari, Y. Wu, A.  
772 Farhat, N. Hellmer, A. Zarebski, B. Hogan, L. Tarassenko, OxCOVID19 Database, a  
773 multimodal data repository for better understanding the global impact of COVID-19, *Scientific*  
774 *Reports*, 11 (2021).
- 775 [65] M.S. Park, H. Jo, H. Lee, S.Y. Jung, H.J. Hwang, Machine Learning-Based COVID-19  
776 Patients Triage Algorithm Using Patient-Generated Health Data from Nationwide Multicenter  
777 Database, *Infect Dis Ther*, (2022).
- 778 [66] Z. Xu, Y. Li, Q. Lei, L. Huang, D.-y. Lai, S.-j. Guo, H.-w. Jiang, H. Hou, Y.-x. Zheng, X.-  
779 n. Wang, J. Wu, M.-l. Ma, B. Zhang, H. Chen, C. Yu, J.-b. Xue, H.-n. Zhang, H. Qi, S. Yu, M.  
780 Lin, Y. Zhang, X. Lin, Z. Yao, H. Sheng, Z. Sun, F. Wang, X. Fan, S.-C. Tao, COVID-ONE-  
781 hi: The One-stop Database for COVID-19 Specific Humoral Immunity and Clinical  
782 Parameters, *Genomics, Proteomics & Bioinformatics*, (2021).
- 783 [67] Q. Zheng, F.K. Jones, S.V. Leavitt, L. Ung, A.B. Labrique, D.H. Peters, E.C. Lee, A.S.  
784 Azman, B. Adhikari, B. Wahl, C. Sarnowski, D.A. Antipora, D.J. Erchick, J. Perez-Saez, J.  
785 Ssekasanvu, K.H. Lee, L. White, N.S. Kostandova, N.P. Menezes, N.W. Albaugh, N. Gupta,  
786 S.S. Jiwani, S.T. Hegde, S. Srivastava, T. Aung, Y. Zhang, G. Norton, A. Kalra, A. Khaitan,  
787 D. Shah, J. Kaur, K. Kasi, L. Patel, L.S. Dhingra, M. Agarwal, S. Garg, U. Goel, V.J.S. Gill,  
788 E. Khan, A. Patwari, P. Khaloo, D. Joshi, E. Blagg, E. Pence, H.K. Nelson, J. Fan, L. Forbes,  
789 M. Schlüssel, S. Etyemez, S. Song, U. Mohan, Y. Sun, S. Jang, N. Frumento, A. Sivakumar,  
790 A.-M. Hartner, V. Karandikar, Z. Yan, E.R. Beiter, J. Song, L. Wedlund, M. Singer, R.S.  
791 Rahman, Z.M. Virk, A. Abar, B. Tiu, T.M. Adamson, K. Paudel, H. Yao, Y. Wang, E.R. Li-  
792 Rodenborn, I. Ozdemir, M.-G. McLean, S. Rattigan, B.A. Borgert, C.A. Moreno, N.E.  
793 Quigley, C. Li, N. Kaur, C. Gimbrone, S.E. Scales, J.C. Zuniga-Moya, P.A. Babigumira, C.C.  
794 Igwe, H.E. Wang, L. Hsieh, S. Misra, K. Bruton, D. Byng, M. Miranda-Schaeubinger, M.N.  
795 Uddin, J.R. Ticehurst, E. Laney, A. Bhadauria, V. Gupta, M.C. Selles, A. Kartik, A. Singh, D.  
796 Garg, J. Saini, J. Kaur, M. Kaur, L. Denis, I. Ekong, Renyuanouyang, T. Fred, A.S.-H. Liu,  
797 M.R. Petersen, P. Agbadi, I. Segawa, V. Scott, Y. Shen, J. Okeeffe, Z. Brennan, M. Singh,  
798 A. Saini, M. Ndukwe, A. Vanajan, J. Minder, E. Lemaitre, L. Pi, M. Saini, M. Cabrera-Aguas,  
799 H.E. Zannat, A. Deng, N.-L.H. Nguyen, P.J. Hinson, L. Buysse, S. Kaur, C. Zhang, C. Saini,  
800 D.Y. Shu, H. Alemi, P. Shivshanker, R.B. Singh, T.B. McKay, X. Wang, S. Lee, N. Petersen,  
801 F. Zielonka, A. Chuang, C. Saussier, D.A. Dutra, E.K. Conlan, L.L.Y. Specter, M. Alhariri, R.  
802 Karahan, T. Yen, Y. Bouchene, A. Sultanov, N. Singh, H.-C. Collaboration, HIT-COVID, a

- 803 global database tracking public health interventions to COVID-19, *Scientific Data*, 7 (2020)  
804 286.
- 805 [68] R.H. Mulholland, E. Vasileiou, C.R. Simpson, C. Robertson, L.D. Ritchie, U. Agrawal, M.  
806 Woolhouse, J.L. Murray, H.R. Stagg, A.B. Docherty, C. McCowan, R. Wood, S.J. Stock, A.  
807 Sheikh, Cohort Profile: Early Pandemic Evaluation and Enhanced Surveillance of COVID-19  
808 (EAVE II) Database, *Int J Epidemiol*, 50 (2021) 1064-1074.
- 809 [69] G. Khullar, M. Chandra, Virtual dermatopathology: A potential educational tool during  
810 COVID-19 pandemic, *Dermatol Ther*, 33 (2020) e13755.
- 811 [70] G. Benetti, N. Cardobi, G. Cardano, C. Arena, C. Micheletto, S. Guariglia, S.  
812 Montemezzi, C. Cavedon, CT-based radiomics as a tool to recognize COVID-19 positive  
813 patients, *Phys Med*, 92 (2021) S46-S46.
- 814 [71] M. Saffern, Cancer therapy tool informs COVID-19 vaccines, *Nat Rev Immunol*, 20  
815 (2020) 352.
- 816 [72] G. Vetrugno, F. Foti, M. Di Pumpo, M. Cicconi, F. D'Ambrosio, D.I. La Milia, R.  
817 Pastorino, S. Boccia, G. Damiani, P. Laurenti, Machine learning and COVID-19: a tool for  
818 healthcare setting choice by primary care physicians, *Eur J Public Health*, 31 (2021)  
819 ckab164.720.
- 820 [73] R. Haider, T.S. Shamsi, N.A. Khan, Machine learning based decipherment of Cell  
821 Population Data: a promising hospital front-door screening tool for COVID-19, *Am J Clin*  
822 *Pathol*, 156 (2021) S101-S102.
- 823 [74] Baseline signatures associated with clinical, virologic, and immunologic outcomes in  
824 patients with mild to moderate COVID-19, 2021.
- 825 [75] J.J. Feld, C. Kandel, M.J. Biondi, R.A. Kozak, M.A. Zahoor, C. Lemieux, S.M. Borgia,  
826 A.K. Boggild, J. Powis, J. McCready, D.H.S. Tan, T. Chan, B. Coburn, D. Kumar, A. Humar,  
827 A. Chan, B. O'Neil, S. Noureldin, J. Booth, R. Hong, D. Smookler, W. Aleyadeh, A. Patel, B.  
828 Barber, J. Casey, R. Hiebert, H. Mistry, I. Choong, C. Hislop, D.M. Santer, D. Lorne Tyrrell,  
829 J.S. Glenn, A.J. Gehring, H.L.A. Janssen, B.E. Hansen, Peginterferon lambda for the  
830 treatment of outpatients with COVID-19: a phase 2, placebo-controlled randomised trial,  
831 *Lancet Respir Med*, 9 (2021) 498-510.
- 832 [76] J. Han, M. Kamber, J. Pei, 3 - Data Preprocessing, in: J. Han, M. Kamber, J. Pei (Eds.)  
833 *Data Mining (Third Edition)*, Morgan Kaufmann, Boston, 2012, pp. 83-124.
- 834 [77] B. Malley, D. Ramazzotti, J.T.-y. Wu, Data Pre-processing, in: M.I.T.C. Data (Ed.)  
835 *Secondary Analysis of Electronic Health Records*, Springer International Publishing, Cham,  
836 2016, pp. 115-141.
- 837 [78] C. Fan, M. Chen, X. Wang, J. Wang, B. Huang, A Review on Data Preprocessing  
838 Techniques Toward Efficient and Reliable Knowledge Discovery From Building Operational  
839 Data, *Frontiers in Energy Research*, 9 (2021).
- 840 [79] S. Garca, J. Luengo, F. Herrera, *Data Preprocessing in Data Mining*, Springer  
841 Publishing Company, Incorporated 2014.
- 842 [80] C.V.G. Zelaya, Towards Explaining the Effects of Data Preprocessing on Machine  
843 Learning, 2019 IEEE 35th International Conference on Data Engineering (ICDE), 2019, pp.  
844 2086-2090.
- 845 [81] J. Lever, M. Krzywinski, N. Altman, Principal component analysis, *Nature Methods*, 14  
846 (2017) 641-642.
- 847 [82] I. Dinc, M. Sigdel, S. Dinc, M.S. Sigdel, M.L. Pusey, R.S. Aygun, Evaluation of  
848 Normalization and PCA on the Performance of Classifiers for Protein Crystallization Images,  
849 *Proc IEEE Southeastcon*, 2014 (2014).
- 850 [83] M.I. Love, W. Huber, S. Anders, Moderated estimation of fold change and dispersion for  
851 RNA-seq data with DESeq2, *Genome Biology*, 15 (2014) 550.
- 852 [84] A. Zhu, J.G. Ibrahim, M.I. Love, Heavy-tailed prior distributions for sequence count data:  
853 removing the noise and preserving large differences, *Bioinformatics*, 35 (2018) 2084-2092.
- 854 [85] R. Vaja, H. Kaur, M. Mazumder, E. Brodsky, In silico Analysis of Transcriptomic Profiling  
855 and Affected Biological pathways in Multiple Sclerosis, *bioRxiv*, (2021)  
856 2021.2008.2015.456398.

- 857 [86] Y. Sha, J.H. Phan, M.D. Wang, Effect of low-expression gene filtering on detection of  
858 differentially expressed genes in RNA-seq data, *Annu Int Conf IEEE Eng Med Biol Soc*,  
859 2015 (2015) 6461-6464.
- 860 [87] M. Kuhn, Building Predictive Models in R Using the caret Package, *Journal of Statistical*  
861 *Software*, 28 (2008) 1 - 26.
- 862 [88] J. Han, M. Kamber, J. Pei, *Data Mining: Concepts and Techniques*, Morgan Kaufmann,  
863 Boston, 2012.
- 864 [89] I.T. Jolliffe, *Principal component analysis for special types of data*, Springer 2002.
- 865 [90] W. Haynes, Bonferroni Correction, in: W. Dubitzky, O. Wolkenhauer, K.-H. Cho, H.  
866 Yokota (Eds.) *Encyclopedia of Systems Biology*, Springer New York, New York, NY, 2013,  
867 pp. 154-154.
- 868 [91] R.A. Armstrong, When to use the Bonferroni correction, *Ophthalmic and Physiological*  
869 *Optics*, 34 (2014) 502-508.
- 870 [92] H. Kaur, A. Dhall, R. Kumar, G.P.S. Raghava, Identification of Platform-Independent  
871 Diagnostic Biomarker Panel for Hepatocellular Carcinoma Using Large-Scale  
872 Transcriptomics Data, *Frontiers in Genetics*, 10 (2020).
- 873 [93] O. Menyhart, B. Wetz, B. Györfy, MultipleTesting.com: A tool for life science  
874 researchers for multiple hypothesis testing correction, *PLOS ONE*, 16 (2021) e0245824.
- 875 [94] M. Jafari, N. Ansari-Pour, Why, When and How to Adjust Your P Values?, *Cell J*, 20  
876 (2019) 604-607.
- 877 [95] D.L. Streiner, Best (but oft-forgotten) practices: the multiple problems of multiplicity—  
878 whether and how to correct for many statistical tests, *The American Journal of Clinical*  
879 *Nutrition*, 102 (2015) 721-728.
- 880 [96] H. Kaur, S. Bhalla, G.P.S. Raghava, Classification of early and late stage liver  
881 hepatocellular carcinoma patients from their genomics and epigenomics profiles, *PLOS*  
882 *ONE*, 14 (2019) e0221476.
- 883 [97] S. Dolaner, H. Kaur, E. Brodsky, J. Panov, M. Mazumder, Identification of LncRNAs as  
884 Therapeutic Targets in Chronic Lymphocytic Leukemia, *Columbia Undergraduate Science*  
885 *Journal (CUSJ)*, Vol. 15 (2021) (2021).
- 886 [98] H. Kaur, S. Bhalla, D. Garg, N. Mehta, G.P.S. Raghava, analysis and prediction of  
887 cholangiocarcinoma from transcriptomic profile of patients, *Journal of Hepatology*, vol. 73  
888 (2020).
- 889 [99] M. Perry, heatmaps (2021). *Flexible Heatmaps for Functional Genomics and Sequence*  
890 *Features*, Bioconductor.
- 891 [100] B.B. Khomtchouk, D.J. Van Booven, C. Wahlestedt, HeatmapGenerator: high  
892 performance RNAseq and microarray visualization software suite to examine differential  
893 gene expression levels using an R and C++ hybrid computational pipeline, *Source Code Biol*  
894 *Med*, 9 (2014) 30.
- 895 [101] E.Y. Chen, C.M. Tan, Y. Kou, Q. Duan, Z. Wang, G.V. Meirelles, N.R. Clark, A.  
896 Ma'ayan, Enrichr: interactive and collaborative HTML5 gene list enrichment analysis tool,  
897 *BMC Bioinformatics*, 14 (2013) 128.
- 898 [102] M.V. Kuleshov, M.R. Jones, A.D. Rouillard, N.F. Fernandez, Q. Duan, Z. Wang, S.  
899 Koplev, S.L. Jenkins, K.M. Jagodnik, A. Lachmann, M.G. McDermott, C.D. Monteiro, G.W.  
900 Gundersen, A. Ma'ayan, Enrichr: a comprehensive gene set enrichment analysis web server  
901 2016 update, *Nucleic Acids Res*, 44 (2016) W90-97.
- 902 [103] Z. Xie, A. Bailey, M.V. Kuleshov, D.J.B. Clarke, J.E. Evangelista, S.L. Jenkins, A.  
903 Lachmann, M.L. Wojciechowicz, E. Kropiwnicki, K.M. Jagodnik, M. Jeon, A. Ma'ayan, *Gene*  
904 *Set Knowledge Discovery with Enrichr*, *Curr Protoc*, 1 (2021) e90.
- 905 [104] E. Chen, M. Kuleshov, A. Bailey, Z. Xie, D.J.B. Clarke, J.E. Evangelista, M.  
906 Wojciechowicz, E. Kropiwnicki, K. Jagodnik, M. Jeon, S. Litz, M. Jones, C. Tan, Y. Kou, N.  
907 Clark, A. Rouillard, N. Fernandez, Q. Duan, Z. Wang, S. Koplev, S. Jenkins, A. Lachmann,  
908 M. McDermott, C. Monteiro, G. Gundersen, A. Ma'ayan, Enrichr search engine, the Ma'ayan  
909 Lab.
- 910 [105] G. Stelzer, N. Rosen, I. Plaschkes, S. Zimmerman, M. Twik, S. Fishilevich, T.I. Stein,  
911 R. Nudel, I. Lieder, Y. Mazor, S. Kaplan, D. Dahary, D. Warshawsky, Y. Guan-Golan, A.



- 912 Kohn, N. Rappaport, M. Safran, D. Lancet, The GeneCards Suite: From Gene Data Mining  
913 to Disease Genome Sequence Analyses, *Curr Protoc Bioinformatics*, 54 (2016) 1 30 31-31  
914 30 33.
- 915 [106] G. Stelzer, N. Rosen, I. Plaschkes, S. Zimmerman, M. Twik, S. Fishilevich, T.I. Stein,  
916 R. Nudel, I. Lieder, Y. Mazor, S. Kaplan, D. Dahary, D. Warshawsky, Y. Guan-Golan, A.  
917 Kohn, N. Rappaport, M. Safran, D. Lancet, *GeneCards®: The Human Gene Database*,  
918 Springer, Singapore, 2016.
- 919 [107] B. Lang, A. Armaos, G.G. Tartaglia, RNAct: Protein-RNA interaction predictions for  
920 model organisms with supporting experimental data, *Nucleic Acids Res*, 47 (2019) D601-  
921 D606.
- 922 [108] M. Uhlen, L. Fagerberg, B.M. Hallstrom, C. Lindskog, P. Oksvold, A. Mardinoglu, A.  
923 Sivertsson, C. Kampf, E. Sjostedt, A. Asplund, I. Olsson, K. Edlund, E. Lundberg, S. Navani,  
924 C.A. Szgyarto, J. Odeberg, D. Djureinovic, J.O. Takanen, S. Hober, T. Alm, P.H. Edqvist, H.  
925 Berling, H. Tegel, J. Mulder, J. Rockberg, P. Nilsson, J.M. Schwenk, M. Hamsten, K. von  
926 Feilitzen, M. Forsberg, L. Persson, F. Johansson, M. Zwahlen, G. von Heijne, J. Nielsen, F.  
927 Ponten, *Proteomics. Tissue-based map of the human proteome*, *Science*, 347 (2015)  
928 1260419.
- 929 [109] M. Uhlen, P. Oksvold, L. Fagerberg, E. Lundberg, K. Jonasson, M. Forsberg, M.  
930 Zwahlen, C. Kampf, K. Wester, S. Hober, H. Wernerus, L. Bjorling, F. Ponten, Towards a  
931 knowledge-based Human Protein Atlas, *Nat Biotechnol*, 28 (2010) 1248-1250.
- 932 [110] A.C. Cunningham, H.P. Goh, D. Koh, Treatment of COVID-19: old tricks for new  
933 challenges, *Critical Care*, 24 (2020) 91.
- 934 [111] S. Faubel, C.L. Edelstein, Mechanisms and mediators of lung injury after acute kidney  
935 injury, *Nat Rev Nephrol*, 12 (2016) 48-60.
- 936 [112] B. Diao, C. Wang, R. Wang, Z. Feng, J. Zhang, H. Yang, Y. Tan, H. Wang, C. Wang,  
937 L. Liu, Y. Liu, Y. Liu, G. Wang, Z. Yuan, X. Hou, L. Ren, Y. Wu, Y. Chen, Human kidney is a  
938 target for novel severe acute respiratory syndrome coronavirus 2 infection, *Nat Commun*, 12  
939 (2021) 2506.
- 940 [113] S. Naicker, C.W. Yang, S.J. Hwang, B.C. Liu, J.H. Chen, V. Jha, The Novel  
941 Coronavirus 2019 epidemic and kidneys, *Kidney Int*, 97 (2020) 824-828.
- 942 [114] T. Chen, D. Wu, H. Chen, W. Yan, D. Yang, G. Chen, K. Ma, D. Xu, H. Yu, H. Wang,  
943 T. Wang, W. Guo, J. Chen, C. Ding, X. Zhang, J. Huang, M. Han, S. Li, X. Luo, J. Zhao, Q.  
944 Ning, Clinical characteristics of 113 deceased patients with coronavirus disease 2019:  
945 retrospective study, *BMJ*, 368 (2020) m1091.
- 946 [115] A. Akter, T. Ahmed, I. Tauheed, M. Akhter, S.I.A. Rahman, F. Khaton, F. Ahmmed, J.  
947 Ferdous, M.H. Afrad, Z. Kawser, M. Hossain, R. Khondaker, M.A. Hasnat, M.A. Sumon, A.  
948 Rashed, S. Ghosh, S.B. Calderwood, R.C. Charles, E.T. Ryan, P. Khatri, H.T. Maecker, G.  
949 Obermoser, B. Pulendran, J.D. Clemens, S. Banu, T. Shirin, R.C. LaRocque, J.B. Harris,  
950 T.R. Bhuiyan, F. Chowdhury, F. Qadri, Disease characteristics and serological responses in  
951 patients with differing severity of COVID-19 infection: A longitudinal cohort study in Dhaka,  
952 Bangladesh, *PLoS Negl Trop Dis*, 16 (2022) e0010102.
- 953 [116] N. Chen, M. Zhou, X. Dong, J. Qu, F. Gong, Y. Han, Y. Qiu, J. Wang, Y. Liu, Y. Wei, J.  
954 Xia, T. Yu, X. Zhang, L. Zhang, Epidemiological and clinical characteristics of 99 cases of  
955 2019 novel coronavirus pneumonia in Wuhan, China: a descriptive study, *Lancet*, 395 (2020)  
956 507-513.
- 957 [117] A.L. Tatura, A. Whitmore, S. Agnihotram, A. Schafer, M.G. Katze, M.T. Heise, R.S.  
958 Baric, Toll-Like Receptor 3 Signaling via TRIF Contributes to a Protective Innate Immune  
959 Response to Severe Acute Respiratory Syndrome Coronavirus Infection, *mBio*, 6 (2015)  
960 e00638-00615.
- 961 [118] P. Lotfinejad, Z. Asadzadeh, S. Najjary, M.H. Somi, K. Hajiasgharzadeh, A.  
962 Mokhtarzadeh, A. Derakhshani, E. Roshani, B. Baradaran, COVID-19 Infection: Concise  
963 Review Based on the Immunological Perspective, *Immunol Invest*, 51 (2022) 246-265.
- 964 [119] L. Filgueira, A. Larionov, N. Lannes, The Influence of Virus Infection on Microglia and  
965 Accelerated Brain Aging, *Cells*, 10 (2021).

- 966 [120] K. Koushki, M. Salemi, S.M. Miri, Y. Arjeini, M. Keshavarz, A. Ghaemi, Role of  
967 myeloid-derived suppressor cells in viral respiratory infections; Hints for discovering  
968 therapeutic targets for COVID-19, *Biomed Pharmacother*, 144 (2021) 112346.
- 969 [121] P. Charitos, I. Heijnen, A. Egli, S. Bassetti, M. Trendelenburg, M. Osthoff, Functional  
970 Activity of the Complement System in Hospitalized COVID-19 Patients: A Prospective  
971 Cohort Study, *Front Immunol*, 12 (2021) 765330.
- 972 [122] A. Polycarpou, M. Howard, C.A. Farrar, R. Greenlaw, G. Fanelli, R. Wallis, L.S.  
973 Klavinskis, S. Sacks, Rationale for targeting complement in COVID-19, *EMBO Mol Med*, 12  
974 (2020) e12642.
- 975 [123] A. Singh, N. Sood, V. Narang, A. Goyal, Morphology of COVID-19-affected cells in  
976 peripheral blood film, *BMJ Case Rep*, 13 (2020).
- 977 [124] N. Reusch, E. De Domenico, L. Bonaguro, J. Schulte-Schrepping, K. Bassler, J.L.  
978 Schultze, A.C. Aschenbrenner, Neutrophils in COVID-19, *Front Immunol*, 12 (2021) 652470.
- 979 [125] B.A. Rosa, M. Ahmed, D.K. Singh, J.A. Choreno-Parra, J. Cole, L.A. Jimenez-Alvarez,  
980 T.S. Rodriguez-Reyna, B. Singh, O. Gonzalez, R. Carrion, Jr., L.S. Schlesinger, J. Martin, J.  
981 Zuniga, M. Mitreva, D. Kaushal, S.A. Khader, IFN signaling and neutrophil degranulation  
982 transcriptional signatures are induced during SARS-CoV-2 infection, *Commun Biol*, 4 (2021)  
983 290.
- 984 [126] E. Akgun, M.B. Tuzuner, B. Sahin, M. Kilercik, C. Kulah, H.N. Cakiroglu, M. Serteser, I.  
985 Unsal, A.T. Baykal, Proteins associated with neutrophil degranulation are upregulated in  
986 nasopharyngeal swabs from SARS-CoV-2 patients, *PLoS One*, 15 (2020) e0240012.
- 987 [127] M.L. Meizlish, A.B. Pine, J.D. Bishai, G. Goshua, E.R. Nadelmann, M. Simonov, C.H.  
988 Chang, H. Zhang, M. Shallow, P. Bahel, K. Owusu, Y. Yamamoto, T. Arora, D.S. Atri, A.  
989 Patel, R. Gbyli, J. Kwan, C.H. Won, C. Dela Cruz, C. Price, J. Koff, B.A. King, H.M. Rinder,  
990 F.P. Wilson, J. Hwa, S. Halene, W. Damsky, D. van Dijk, A.I. Lee, H. Chun, A neutrophil  
991 activation signature predicts critical illness and mortality in COVID-19, *medRxiv*, (2020).
- 992 [128] J.-M. Berthelot, F. Lioté, Y. Maugars, J. Sibilia, Lymphocyte Changes in Severe  
993 COVID-19: Delayed Over-Activation of STING?, *Frontiers in Immunology*, 11 (2020).
- 994 [129] C.D. Russell, C.J. Fairfield, T.M. Drake, L. Turtle, R.A. Seaton, D.G. Wootton, L.  
995 Sigfrid, E.M. Harrison, A.B. Docherty, T.I. de Silva, C. Egan, R. Pius, H.E. Hardwick, L.  
996 Merson, M. Girvan, J. Dunning, J.S. Nguyen-Van-Tam, P.J.M. Openshaw, J.K. Baillie, M.G.  
997 Semple, A. Ho, I.C. investigators, Co-infections, secondary infections, and antimicrobial use  
998 in patients hospitalised with COVID-19 during the first pandemic wave from the ISARIC  
999 WHO CCP-UK study: a multicentre, prospective cohort study, *Lancet Microbe*, 2 (2021)  
1000 e354-e365.
- 1001 [130] A. De Bruyn, S. Verellen, L. Bruckers, L. Geebelen, I. Callebaut, I. De Pauw, B.  
1002 Stessel, J. Dubois, Secondary infection in COVID-19 critically ill patients: a retrospective  
1003 single-center evaluation, *BMC Infect Dis*, 22 (2022) 207.
- 1004 [131] P. Bourgoin, G. Biechele, I. Ait Belkacem, P.E. Morange, F. Malergue, Role of the  
1005 interferons in CD64 and CD169 expressions in whole blood: Relevance in the balance  
1006 between viral- or bacterial-oriented immune responses, *Immun Inflamm Dis*, 8 (2020) 106-  
1007 123.
- 1008 [132] R. Tyagi, P.S. Bisen, Immune response activation and immunomodulation, *BoD–Books*  
1009 *on Demand*2019.
- 1010 [133] M. Klaas, P.R. Crocker, Sialoadhesin in recognition of self and non-self, *Semin*  
1011 *Immunopathol*, 34 (2012) 353-364.
- 1012 [134] W.B. Puryear, H. Akiyama, S.D. Geer, N.P. Ramirez, X. Yu, B.M. Reinhard, S.  
1013 Gummuluru, Interferon-inducible mechanism of dendritic cell-mediated HIV-1 dissemination  
1014 is dependent on Siglec-1/CD169, *PLoS pathogens*, 9 (2013) e1003291.
- 1015 [135] P. Bourgoin, T. Soliveres, D. Ahriz, I. Arnoux, C. Meisel, N. Unterwalder, P.E.  
1016 Morange, P. Michelet, F. Malergue, T. Markarian, Clinical research assessment by flow  
1017 cytometry of biomarkers for infectious stratification in an Emergency Department, *Biomark*  
1018 *Med*, 13 (2019) 1373-1386.

- 1019 [136] P.J. Lester, K.H. Buick, J.W. Baty, A. Felden, J. Haywood, Different bacterial and viral  
1020 pathogens trigger distinct immune responses in a globally invasive ant, *Sci Rep*, 9 (2019)  
1021 5780.
- 1022 [137] A. Ray, B.N. Dittel, Interrelatedness between dysbiosis in the gut microbiota due to  
1023 immunodeficiency and disease penetrance of colitis, *Immunology*, 146 (2015) 359-368.
- 1024 [138] B. Long, W.J. Brady, A. Koyfman, M. Gottlieb, Cardiovascular complications in COVID-  
1025 19, *Am J Emerg Med*, 38 (2020) 1504-1507.
- 1026 [139] C. Kellogg, O. Equils, The role of the thymus in COVID-19 disease severity:  
1027 implications for antibody treatment and immunization, *Hum Vaccin Immunother*, 17 (2021)  
1028 638-643.
- 1029 [140] X. Dai, D. Zhang, C. Wang, Z. Wu, C. Liang, The Pivotal Role of Thymus in  
1030 Atherosclerosis Mediated by Immune and Inflammatory Response, *International Journal of*  
1031 *Medical Sciences*, 15 (2018) 1555-1563.
- 1032 [141] A.B. Reis, F.C. Araujo, V.M. Pereira, A.M. Dos Reis, R.A. Santos, F.M. Reis,  
1033 Angiotensin (1-7) and its receptor Mas are expressed in the human testis: implications for  
1034 male infertility, *J Mol Histol*, 41 (2010) 75-80.
- 1035 [142] E. Illiano, F. Trama, E. Costantini, Could COVID-19 have an impact on male fertility?,  
1036 *Andrologia*, 52 (2020) e13654.
- 1037 [143] J.M. Zhao, G.D. Zhou, Y.L. Sun, S.S. Wang, J.F. Yang, E.H. Meng, D. Pan, W.S. Li,  
1038 X.S. Zhou, Y.D. Wang, J.Y. Lu, N. Li, D.W. Wang, B.C. Zhou, T.H. Zhang, [Clinical  
1039 pathology and pathogenesis of severe acute respiratory syndrome], *Zhonghua Shi Yan He*  
1040 *Lin Chuang Bing Du Xue Za Zhi*, 17 (2003) 217-221.
- 1041 [144] Y. Ding, L. He, Q. Zhang, Z. Huang, X. Che, J. Hou, H. Wang, H. Shen, L. Qiu, Z. Li, J.  
1042 Geng, J. Cai, H. Han, X. Li, W. Kang, D. Weng, P. Liang, S. Jiang, Organ distribution of  
1043 severe acute respiratory syndrome (SARS) associated coronavirus (SARS-CoV) in SARS  
1044 patients: implications for pathogenesis and virus transmission pathways, *J Pathol*, 203  
1045 (2004) 622-630.
- 1046 [145] F. Pan, X. Xiao, J. Guo, Y. Song, H. Li, D.P. Patel, A.M. Spivak, J.P. Alukal, X. Zhang,  
1047 C. Xiong, P.S. Li, J.M. Hotaling, No evidence of severe acute respiratory syndrome-  
1048 coronavirus 2 in semen of males recovering from coronavirus disease 2019, *Fertil Steril*, 113  
1049 (2020) 1135-1139.
- 1050 [146] C. Song, Y. Wang, W. Li, B. Hu, G. Chen, P. Xia, W. Wang, C. Li, F. Diao, Z. Hu, X.  
1051 Yang, B. Yao, Y. Liu, Absence of 2019 novel coronavirus in semen and testes of COVID-19  
1052 patients, *Biol Reprod*, 103 (2020) 4-6.
- 1053 [147] N. Holtmann, P. Edimiris, M. Andree, C. Doehmen, D. Baston-Buest, O. Adams, J.S.  
1054 Kruessel, A.P. Bielfeld, Assessment of SARS-CoV-2 in human semen-a cohort study, *Fertil*  
1055 *Steril*, 114 (2020) 233-238.
- 1056 [148] D. Li, M. Jin, P. Bao, W. Zhao, S. Zhang, Clinical Characteristics and Results of  
1057 Semen Tests Among Men With Coronavirus Disease 2019, *JAMA Netw Open*, 3 (2020)  
1058 e208292.
- 1059 [149] M.A. Khalili, K. Leisegang, A. Majzoub, R. Finelli, M.K. Panner Selvam, R. Henkel, M.  
1060 Mojgan, A. Agarwal, Male Fertility and the COVID-19 Pandemic: Systematic Review of the  
1061 Literature, *World J Mens Health*, 38 (2020) 506-520.
- 1062 [150] J. Xu, L. Qi, X. Chi, J. Yang, X. Wei, E. Gong, S. Peh, J. Gu, Orchitis: a complication of  
1063 severe acute respiratory syndrome (SARS), *Biol Reprod*, 74 (2006) 410-416.
- 1064 [151] J.M. Bartleson, D. Radenkovic, A.J. Covarrubias, D. Furman, D.A. Winer, E. Verdin,  
1065 SARS-CoV-2, COVID-19 and the Ageing Immune System, *Nat Aging*, 1 (2021) 769-782.
- 1066
- 1067
